# Supplementary material for: All-cis 1,2,3,4,5,6-hexafluorocyclohexane is a facially polarized cyclohexane
Source: Springer Nature journal article supplement (doi:10.1038/nchem.2232), 2015-04-13
Supplement: 41557_2015_BFnchem2232_MOESM1_ESM.cif [file 41557_2015_BFnchem2232_MOESM1_ESM.cif]

data_1
_publ_section_references
;
    ENTER OTHER REFERENCES

    Rigaku (2014). CrystalStructure. Version 4.1. 
    Rigaku Corporation, Tokyo, Japan.

    Burla, M. C., Caliandro, R., Camalli, M., Carrozzini, B., 
    Cascarano, G. L., De Caro, L., Giacovazzo, C., Polidori, G. and Spagna R.
    (2005). J. Appl. Cryst. 38, 381-388.
    SIR2004

    Rigaku (1998). REQAB. 
    Rigaku Corporation, Tokyo, Japan.

;

_chemical_formula_sum                             'C6 H6 F6'
_chemical_formula_moiety                          'C6 H6 F6'
_chemical_formula_weight                           192.10
_chemical_melting_point                            ?
_chemical_absolute_configuration
                                                 'syn'

#==============================================================================
# CRYSTAL DATA
_space_group_crystal_system                        monoclinic
_space_group_name_H-M_alt                         'P 1 21 1'
_space_group_name_Hall                            'P 2yb'
_space_group_IT_number                             4
loop_
_symmetry_equiv_pos_site_id
_space_group_symop_operation_xyz
1   '+X,+Y,+Z'
2   '-X,1/2+Y,-Z'
#------------------------------------------------------------------------------
_cell_length_a                                     5.556(8)
_cell_length_b                                     5.842(8)
_cell_length_c                                     10.511(17)
_cell_angle_alpha                                  90.0000
_cell_angle_beta                                   93.54(4)
_cell_angle_gamma                                  90.0000
_cell_volume                                       340.5(9)
_cell_formula_units_Z                              2
_cell_measurement_reflns_used                      398
_cell_measurement_theta_min                        26.60
_cell_measurement_theta_max                        68.25
_cell_measurement_temperature                      125
#------------------------------------------------------------------------------
_exptl_crystal_description                         platelet
_exptl_crystal_colour                              colorless
_exptl_crystal_size_max                            0.240
_exptl_crystal_size_mid                            0.100
_exptl_crystal_size_min                            0.010
_exptl_crystal_density_diffrn                      1.873
_exptl_crystal_density_meas                        ?
_exptl_crystal_density_method                     'not measured'
_exptl_crystal_F_000                               192.00
_exptl_absorpt_coefficient_mu                      2.076
_exptl_absorpt_correction_type                     multi-scan
_exptl_absorpt_process_details                    'REQAB (Rigaku, 1998)'
_exptl_absorpt_correction_T_min                    0.645
_exptl_absorpt_correction_T_max                    0.979

#==============================================================================
# EXPERIMENTAL DATA

_diffrn_ambient_temperature                        125
_diffrn_radiation_type                            'Cu K\a'
_diffrn_radiation_wavelength                       1.54187
_diffrn_measurement_device_type                   'Rigaku XtaLAB P100'
_diffrn_measurement_method                         \w
_diffrn_detector_area_resol_mean                   5.811
_diffrn_reflns_number                              2261
_diffrn_reflns_av_R_equivalents                    0.0414
_diffrn_reflns_theta_max                           68.468
_diffrn_reflns_theta_min                           4.214
_diffrn_reflns_theta_full                          67.000
_diffrn_measured_fraction_theta_max                0.980
_diffrn_measured_fraction_theta_full               0.982
_diffrn_reflns_Laue_measured_fraction_max          0.980
_diffrn_reflns_Laue_measured_fraction_full         0.982
_diffrn_reflns_point_group_measured_fraction_max   0.896
_diffrn_reflns_point_group_measured_fraction_full  0.900
_diffrn_reflns_limit_h_min                        -6
_diffrn_reflns_limit_h_max                         5
_diffrn_reflns_limit_k_min                        -7
_diffrn_reflns_limit_k_max                         6
_diffrn_reflns_limit_l_min                        -12
_diffrn_reflns_limit_l_max                         12
_diffrn_standards_number                           0
_diffrn_standards_interval_count                   .
_diffrn_standards_decay_%                          ?

#==============================================================================
# REFINEMENT DATA

_refine_special_details
;
    Refinement was performed using all reflections. The weighted 
    R-factor (wR) and goodness of fit (S) are based on F^2^.
    R-factor (gt) are based on F. The threshold expression of
    F^2^ > 2.0 sigma(F^2^) is used only for calculating R-factor (gt).
;
_reflns_number_total                               1124
_reflns_number_gt                                  953
_reflns_threshold_expression                       F^2^>2.0\s(F^2^)
_refine_ls_structure_factor_coef                   Fsqd
_refine_ls_R_factor_all                            0.0639
_refine_ls_R_factor_gt                             0.0604
_refine_ls_wR_factor_ref                           0.1519
_refine_ls_wR_factor_gt                            0.1496
_refine_ls_number_restraints                       1
_refine_ls_hydrogen_treatment                      constr
_refine_ls_number_reflns                           1124
_refine_ls_number_parameters                       109
_refine_ls_goodness_of_fit_ref                     1.036
_refine_ls_weighting_scheme                        calc
_refine_ls_weighting_details
           'w = 1/[\s^2^(Fo^2^)+(0.1039P)^2^+0.0000P] where P=(Fo^2^+2Fc^2^)/3'
_atom_sites_solution_hydrogens                     geom
_atom_sites_solution_primary                       direct
_atom_sites_solution_secondary                     difmap
_refine_ls_shift/su_max                            0.000
_refine_diff_density_max                           0.38
_refine_diff_density_min                          -0.25
_refine_ls_extinction_method                       none
_refine_ls_extinction_coef                         ?
_refine_ls_abs_structure_details
;
 Flack x determined using 306 quotients [(I+)-(I-)]/[(I+)+(I-)]
 (Parsons, Flack and Wagner, Acta Cryst. B69 (2013) 249-259).
;
_refine_ls_abs_structure_Flack                     0.4(2)

loop_
_atom_type_symbol
_atom_type_description
_atom_type_scat_dispersion_real
_atom_type_scat_dispersion_imag
_atom_type_scat_source
  'C' 'C'  0.0181 0.0091 
;
International Tables for Crystallography
(Vol. C, Tables 4.2.6.8 and 6.1.1.4)
;
  'H' 'H'  0.0000 0.0000 
;
International Tables for Crystallography
(Vol. C, Table 6.1.1.4)
;
  'F' 'F'  0.0727 0.0534 
;
International Tables for Crystallography
(Vol. C, Tables 4.2.6.8 and 6.1.1.4)
;

#==============================================================================
# ATOMIC COORDINATES AND THERMAL PARAMETERS

loop_
_atom_site_label
_atom_site_type_symbol
_atom_site_fract_x
_atom_site_fract_y
_atom_site_fract_z
_atom_site_U_iso_or_equiv
_atom_site_adp_type
_atom_site_occupancy
_atom_site_site_symmetry_multiplicity
_atom_site_calc_flag
_atom_site_refinement_flags
_atom_site_disorder_assembly
_atom_site_disorder_group
 F1 F 0.4103(6) 0.6298(6) 0.1132(3) 0.0611(9) Uani 1 2 d . . .
 F2 F 0.3565(6) 0.9101(7) 0.3165(3) 0.0716(10) Uani 1 2 d . . .
 F3 F 0.4646(6) 0.4603(6) 0.3606(3) 0.0667(10) Uani 1 2 d . . .
 F4 F 0.9278(7) 0.3283(7) 0.4164(3) 0.0757(11) Uani 1 2 d . . .
 F5 F 0.7437(7) 0.2922(5) 0.1696(3) 0.0663(10) Uani 1 2 d . . .
 F6 F 0.8353(6) 0.6238(6) -0.0033(3) 0.0652(9) Uani 1 2 d . . .
 C1 C 0.5917(10) 0.7795(10) 0.1513(5) 0.0531(12) Uani 1 2 d . . .
 C2 C 0.5841(10) 0.8295(10) 0.2934(5) 0.0571(13) Uani 1 2 d . . .
 C3 C 0.6450(11) 0.6249(11) 0.3775(4) 0.0564(13) Uani 1 2 d . . .
 C4 C 0.8823(10) 0.5247(11) 0.3449(5) 0.0601(14) Uani 1 2 d . . .
 C5 C 0.9000(10) 0.4671(11) 0.2043(5) 0.0570(13) Uani 1 2 d . . .
 C6 C 0.8332(10) 0.6789(10) 0.1245(4) 0.0538(13) Uani 1 2 d . . .
 H1 H 0.56853 0.92585 0.10267 0.0638 Uiso 1 2 calc R . .
 H2 H 0.70357 0.9533 0.31589 0.0685 Uiso 1 2 calc R . .
 H3 H 0.65659 0.67507 0.46859 0.0677 Uiso 1 2 calc R . .
 H4 H 1.01135 0.63861 0.36939 0.0722 Uiso 1 2 calc R . .
 H5 H 1.06875 0.41966 0.18897 0.0684 Uiso 1 2 calc R . .
 H6 H 0.95923 0.79829 0.14372 0.0646 Uiso 1 2 calc R . .


loop_
_atom_site_aniso_label
_atom_site_aniso_U_11
_atom_site_aniso_U_22
_atom_site_aniso_U_33
_atom_site_aniso_U_12
_atom_site_aniso_U_13
_atom_site_aniso_U_23
 F1 0.0625(17) 0.0688(19) 0.0513(15) -0.0103(16) -0.0021(13) 0.0033(14)
 F2 0.083(2) 0.069(2) 0.0642(19) 0.0083(19) 0.0116(15) -0.0048(16)
 F3 0.073(2) 0.069(2) 0.0580(18) -0.0168(17) 0.0026(14) 0.0097(15)
 F4 0.086(2) 0.079(3) 0.0609(19) 0.008(2) -0.0031(14) 0.0203(17)
 F5 0.088(2) 0.0498(19) 0.0611(18) -0.0140(16) 0.0029(14) -0.0023(14)
 F6 0.083(2) 0.070(2) 0.0430(15) -0.0059(17) 0.0091(13) 0.0019(15)
 C1 0.068(3) 0.046(3) 0.045(2) -0.010(2) -0.001(2) 0.005(2)
 C2 0.061(3) 0.055(3) 0.055(3) -0.010(3) 0.005(2) -0.002(2)
 C3 0.070(3) 0.059(3) 0.039(2) -0.008(3) -0.001(2) -0.004(2)
 C4 0.070(3) 0.064(3) 0.046(3) -0.014(3) -0.005(2) 0.006(2)
 C5 0.062(3) 0.061(3) 0.048(3) -0.004(3) 0.003(2) 0.002(2)
 C6 0.062(3) 0.055(3) 0.044(3) -0.015(3) 0.001(2) 0.001(2)

#==============================================================================
_computing_data_collection
                                'CrystalClear-SM Expert 2.1 b29 (Rigaku, 2013)'
_computing_cell_refinement
                                               'CrystalClear-SM Expert 2.1 b29'
_computing_data_reduction
                                               'CrystalClear-SM Expert 2.1 b29'
_computing_structure_solution
                                                'SIR2004 (Burla, et al., 2005)'
_computing_structure_refinement
                                                 'SHELXL2013 (Sheldrick, 2008)'
_computing_publication_material
                                          'CrystalStructure 4.1 (Rigaku, 2014)'
_computing_molecular_graphics                     'CrystalStructure 4.1'

#==============================================================================
# MOLECULAR GEOMETRY

_geom_special_details
;
    ENTER SPECIAL DETAILS OF THE MOLECULAR GEOMETRY
;

loop_
_geom_bond_atom_site_label_1
_geom_bond_atom_site_label_2
_geom_bond_distance
_geom_bond_publ_flag
_geom_bond_site_symmetry_1
_geom_bond_site_symmetry_2
F1 C1 1.375(7) yes . .
F2 C2 1.385(7) yes . .
F3 C3 1.393(7) yes . .
F4 C4 1.386(7) yes . .
F5 C5 1.376(7) yes . .
F6 C6 1.382(6) yes . .
C1 C2 1.525(8) yes . .
C1 C6 1.507(8) yes . .
C2 C3 1.512(8) yes . .
C3 C4 1.501(8) yes . .
C4 C5 1.525(8) yes . .
C5 C6 1.528(8) yes . .
C1 H1 1.000 no . .
C2 H2 1.000 no . .
C3 H3 1.000 no . .
C4 H4 1.000 no . .
C5 H5 1.000 no . .
C6 H6 1.000 no . .

loop_
_geom_angle_atom_site_label_1
_geom_angle_atom_site_label_2
_geom_angle_atom_site_label_3
_geom_angle
_geom_angle_publ_flag
_geom_angle_site_symmetry_1
_geom_angle_site_symmetry_2
_geom_angle_site_symmetry_3
F1 C1 C2 110.1(4) yes . . .
F1 C1 C6 110.0(4) yes . . .
C2 C1 C6 109.6(4) yes . . .
F2 C2 C1 108.5(4) yes . . .
F2 C2 C3 109.9(5) yes . . .
C1 C2 C3 113.7(5) yes . . .
F3 C3 C2 109.8(4) yes . . .
F3 C3 C4 109.7(5) yes . . .
C2 C3 C4 110.1(5) yes . . .
F4 C4 C3 109.4(5) yes . . .
F4 C4 C5 108.8(5) yes . . .
C3 C4 C5 114.6(4) yes . . .
F5 C5 C4 110.1(5) yes . . .
F5 C5 C6 109.1(4) yes . . .
C4 C5 C6 109.0(5) yes . . .
F6 C6 C1 109.4(4) yes . . .
F6 C6 C5 109.2(4) yes . . .
C1 C6 C5 113.7(4) yes . . .
F1 C1 H1 109.036 no . . .
C2 C1 H1 109.031 no . . .
C6 C1 H1 109.042 no . . .
F2 C2 H2 108.191 no . . .
C1 C2 H2 108.189 no . . .
C3 C2 H2 108.186 no . . .
F3 C3 H3 109.091 no . . .
C2 C3 H3 109.091 no . . .
C4 C3 H3 109.087 no . . .
F4 C4 H4 107.921 no . . .
C3 C4 H4 107.924 no . . .
C5 C4 H4 107.922 no . . .
F5 C5 H5 109.535 no . . .
C4 C5 H5 109.540 no . . .
C6 C5 H5 109.537 no . . .
F6 C6 H6 108.106 no . . .
C1 C6 H6 108.109 no . . .
C5 C6 H6 108.110 no . . .

loop_
_geom_torsion_atom_site_label_1
_geom_torsion_atom_site_label_2
_geom_torsion_atom_site_label_3
_geom_torsion_atom_site_label_4
_geom_torsion
_geom_torsion_publ_flag
_geom_torsion_site_symmetry_1
_geom_torsion_site_symmetry_2
_geom_torsion_site_symmetry_3
_geom_torsion_site_symmetry_4
F1 C1 C2 F2 -55.7(6) no . . . .
F1 C1 C2 C3 66.9(5) no . . . .
F1 C1 C6 F6 56.0(5) no . . . .
F1 C1 C6 C5 -66.4(5) no . . . .
C2 C1 C6 F6 177.2(4) no . . . .
C2 C1 C6 C5 54.8(6) no . . . .
C6 C1 C2 F2 -176.8(4) no . . . .
C6 C1 C2 C3 -54.2(6) no . . . .
F2 C2 C3 F3 54.3(5) no . . . .
F2 C2 C3 C4 175.2(4) no . . . .
C1 C2 C3 F3 -67.5(6) no . . . .
C1 C2 C3 C4 53.3(6) no . . . .
F3 C3 C4 F4 -55.0(5) no . . . .
F3 C3 C4 C5 67.5(5) no . . . .
C2 C3 C4 F4 -175.9(4) no . . . .
C2 C3 C4 C5 -53.4(6) no . . . .
F4 C4 C5 F5 56.5(6) no . . . .
F4 C4 C5 C6 176.2(4) no . . . .
C3 C4 C5 F5 -66.4(7) no . . . .
C3 C4 C5 C6 53.3(6) no . . . .
F5 C5 C6 F6 -56.3(5) no . . . .
F5 C5 C6 C1 66.3(5) no . . . .
C4 C5 C6 F6 -176.5(4) no . . . .
C4 C5 C6 C1 -54.0(6) no . . . .

loop_
_geom_contact_atom_site_label_1
_geom_contact_atom_site_label_2
_geom_contact_distance
_geom_contact_publ_flag
_geom_contact_site_symmetry_1
_geom_contact_site_symmetry_2
F1 F2 2.724(6) no . .
F1 F3 2.782(6) no . .
F1 F5 2.745(5) no . .
F1 F6 2.726(6) no . .
F1 C3 2.995(7) no . .
F1 C4 3.521(7) no . .
F1 C5 2.984(7) no . .
F2 F3 2.729(6) no . .
F3 F4 2.716(6) no . .
F3 F5 2.791(6) no . .
F3 C1 3.002(7) no . .
F3 C5 3.008(7) no . .
F3 C6 3.551(7) no . .
F4 F5 2.738(6) no . .
F5 F6 2.725(5) no . .
F5 C1 2.973(7) no . .
F5 C2 3.532(8) no . .
F5 C3 3.000(7) no . .
C1 C4 2.926(8) no . .
C2 C5 2.940(9) no . .
C3 C6 2.933(8) no . .
F1 F5 3.186(6) no . 2_655
F1 F6 3.350(6) no . 1_455
F1 F6 3.426(6) no . 2_645
F1 F6 3.366(6) no . 2_655
F1 C1 3.451(7) no . 2_645
F1 C5 3.193(8) no . 1_455
F1 C6 3.229(8) no . 1_455
F2 F3 3.297(7) no . 1_565
F2 F3 3.489(7) no . 2_656
F2 F4 3.340(7) no . 2_656
F2 F5 3.522(6) no . 1_565
F2 C3 3.454(8) no . 2_656
F2 C4 3.493(8) no . 1_455
F3 F2 3.297(7) no . 1_545
F3 F2 3.489(7) no . 2_646
F3 F4 3.170(6) no . 1_455
F3 C3 3.464(8) no . 2_646
F3 C4 3.251(8) no . 1_455
F3 C5 3.450(8) no . 1_455
F4 F2 3.340(7) no . 2_646
F4 F3 3.170(6) no . 1_655
F4 F4 3.477(6) no . 2_746
F4 F4 3.477(6) no . 2_756
F4 C3 3.332(7) no . 2_746
F4 C4 3.198(7) no . 2_746
F5 F1 3.186(6) no . 2_645
F5 F2 3.522(6) no . 1_545
F5 F6 3.162(6) no . 2_745
F5 C1 3.114(8) no . 1_545
F5 C2 3.151(7) no . 1_545
F6 F1 3.350(6) no . 1_655
F6 F1 3.366(6) no . 2_645
F6 F1 3.426(6) no . 2_655
F6 F5 3.162(6) no . 2_755
F6 F6 3.446(6) no . 2_745
F6 F6 3.446(6) no . 2_755
F6 C1 3.411(7) no . 2_645
F6 C5 3.322(7) no . 2_755
F6 C6 3.473(7) no . 2_745
C1 F1 3.451(7) no . 2_655
C1 F5 3.114(8) no . 1_565
C1 F6 3.411(7) no . 2_655
C2 F5 3.151(7) no . 1_565
C3 F2 3.454(8) no . 2_646
C3 F3 3.464(8) no . 2_656
C3 F4 3.332(7) no . 2_756
C4 F2 3.493(8) no . 1_655
C4 F3 3.251(8) no . 1_655
C4 F4 3.198(7) no . 2_756
C5 F1 3.193(8) no . 1_655
C5 F3 3.450(8) no . 1_655
C5 F6 3.322(7) no . 2_745
C6 F1 3.229(8) no . 1_655
C6 F6 3.473(7) no . 2_755
F1 H2 3.2154 no . .
F1 H6 3.2019 no . .
F2 H1 2.6026 no . .
F2 H3 2.6252 no . .
F3 H2 3.2180 no . .
F3 H4 3.2073 no . .
F4 H3 2.6030 no . .
F4 H5 2.6163 no . .
F5 H4 3.2146 no . .
F5 H6 3.2078 no . .
F6 H1 2.5988 no . .
F6 H5 2.6199 no . .
C1 H3 3.3882 no . .
C1 H4 3.2727 no . .
C1 H5 3.3870 no . .
C2 H4 2.6984 no . .
C2 H6 2.6937 no . .
C3 H1 3.3855 no . .
C3 H5 3.3883 no . .
C3 H6 3.2617 no . .
C4 H2 2.7039 no . .
C4 H6 2.7061 no . .
C5 H1 3.3873 no . .
C5 H2 3.2855 no . .
C5 H3 3.3894 no . .
C6 H2 2.7042 no . .
C6 H4 2.7101 no . .
H1 H2 2.3246 no . .
H1 H6 2.3103 no . .
H2 H3 2.3104 no . .
H2 H4 2.5497 no . .
H2 H6 2.5358 no . .
H3 H4 2.2959 no . .
H4 H5 2.3257 no . .
H4 H6 2.5487 no . .
H5 H6 2.3352 no . .
F1 H1 2.5714 no . 2_645
F1 H4 3.5928 no . 1_455
F1 H5 2.4352 no . 1_455
F1 H6 2.7300 no . 1_455
F2 H3 2.7432 no . 2_656
F2 H4 2.5759 no . 1_455
F2 H5 3.5069 no . 1_455
F2 H5 3.5984 no . 1_465
F2 H6 2.8464 no . 1_455
F3 H2 3.2916 no . 1_545
F3 H2 3.5817 no . 2_646
F3 H3 2.5695 no . 2_646
F3 H4 2.7318 no . 1_455
F3 H5 2.7673 no . 1_455
F4 H2 2.7030 no . 1_545
F4 H2 3.4544 no . 2_746
F4 H3 2.6926 no . 2_746
F4 H4 2.5135 no . 2_746
F5 H1 2.4365 no . 1_545
F5 H1 3.3457 no . 2_645
F5 H2 2.5253 no . 1_545
F5 H6 3.1419 no . 1_545
F6 H1 2.6781 no . 2_645
F6 H5 2.6853 no . 2_755
F6 H6 2.7032 no . 2_745
C1 H1 3.4484 no . 2_645
C1 H6 3.5117 no . 1_455
C2 H3 3.5409 no . 2_656
C2 H4 3.5105 no . 1_455
C3 H3 3.5593 no . 2_646
C3 H4 3.5174 no . 1_455
C4 H2 3.4907 no . 1_545
C5 H2 3.4254 no . 1_545
C6 H1 3.4945 no . 2_645
H1 F1 2.5714 no . 2_655
H1 F5 2.4365 no . 1_565
H1 F5 3.3457 no . 2_655
H1 F6 2.6781 no . 2_655
H1 C1 3.4484 no . 2_655
H1 C6 3.4945 no . 2_655
H1 H6 3.5187 no . 1_455
H2 F3 3.2916 no . 1_565
H2 F3 3.5817 no . 2_656
H2 F4 2.7030 no . 1_565
H2 F4 3.4544 no . 2_756
H2 F5 2.5253 no . 1_565
H2 C4 3.4907 no . 1_565
H2 C5 3.4254 no . 1_565
H2 H3 3.3726 no . 2_656
H3 F2 2.7432 no . 2_646
H3 F3 2.5695 no . 2_656
H3 F4 2.6926 no . 2_756
H3 C2 3.5409 no . 2_646
H3 C3 3.5593 no . 2_656
H3 H2 3.3726 no . 2_646
H3 H3 3.4839 no . 2_646
H3 H3 3.4839 no . 2_656
H4 F1 3.5928 no . 1_655
H4 F2 2.5759 no . 1_655
H4 F3 2.7318 no . 1_655
H4 F4 2.5135 no . 2_756
H4 C2 3.5105 no . 1_655
H4 C3 3.5174 no . 1_655
H5 F1 2.4352 no . 1_655
H5 F2 3.5984 no . 1_645
H5 F2 3.5069 no . 1_655
H5 F3 2.7673 no . 1_655
H5 F6 2.6853 no . 2_745
H5 H6 3.5621 no . 2_745
H6 F1 2.7300 no . 1_655
H6 F2 2.8464 no . 1_655
H6 F5 3.1419 no . 1_565
H6 F6 2.7032 no . 2_755
H6 C1 3.5117 no . 1_655
H6 H1 3.5187 no . 1_655
H6 H5 3.5621 no . 2_755

#==============================================================================

#==============================================================================
# Additional structures and associated data_? identifiers
# should be added at this point if there is more than one 
# structure analysis in the CIF.


_shelx_res_file
;

    shelxl.res created by SHELXL-2014/7

TITL NKDH25R
CELL  1.54187 5.55590 5.84190 10.51120 90.00000 93.54120 90.00000
ZERR  2 0.00773 0.00774 0.01729 0.00000 0.04320 0.00000
LATT -1
SYMM    -X, .50+Y,    -Z
SFAC C H F
UNIT 12 12 12
L.S. 20
FMAP 2
PLAN -5
WPDB -2
HTAB
BOND $H
CONF
LIST 4
TEMP -148.0
ACTA 134
SIZE 0.010 0.100 0.240
WGHT    0.103900
FVAR       4.94222
F1    3    0.410316    0.629775    0.113151    11.00000    0.06255    0.06883 =
         0.05132    0.00331   -0.00211   -0.01026
F2    3    0.356548    0.910127    0.316478    11.00000    0.08261    0.06906 =
         0.06416   -0.00478    0.01163    0.00825
F3    3    0.464576    0.460325    0.360624    11.00000    0.07314    0.06869 =
         0.05800    0.00966    0.00261   -0.01682
F4    3    0.927791    0.328345    0.416416    11.00000    0.08603    0.07920 =
         0.06087    0.02033   -0.00312    0.00752
F5    3    0.743706    0.292156    0.169553    11.00000    0.08796    0.04979 =
         0.06109   -0.00228    0.00294   -0.01404
F6    3    0.835257    0.623791   -0.003258    11.00000    0.08285    0.07049 =
         0.04302    0.00190    0.00907   -0.00587
C1    1    0.591696    0.779519    0.151252    11.00000    0.06764    0.04604 =
         0.04524    0.00481   -0.00077   -0.00964
AFIX  13
H1    2    0.568532    0.925847    0.102665    11.00000   -1.20000
AFIX   0
C2    1    0.584144    0.829486    0.293382    11.00000    0.06097    0.05510 =
         0.05543   -0.00232    0.00490   -0.00963
AFIX  13
H2    2    0.703565    0.953303    0.315889    11.00000   -1.20000
AFIX   0
C3    1    0.645043    0.624921    0.377452    11.00000    0.07043    0.05949 =
         0.03880   -0.00435   -0.00077   -0.00827
AFIX  13
H3    2    0.656589    0.675074    0.468586    11.00000   -1.20000
AFIX   0
C4    1    0.882314    0.524704    0.344948    11.00000    0.06986    0.06371 =
         0.04582    0.00579   -0.00459   -0.01363
AFIX  13
H4    2    1.011349    0.638611    0.369386    11.00000   -1.20000
AFIX   0
C5    1    0.900027    0.467046    0.204287    11.00000    0.06153    0.06116 =
         0.04836    0.00204    0.00270   -0.00364
AFIX  13
H5    2    1.068754    0.419655    0.188969    11.00000   -1.20000
AFIX   0
C6    1    0.833192    0.678911    0.124526    11.00000    0.06183    0.05513 =
         0.04429    0.00121    0.00108   -0.01498
AFIX  13
H6    2    0.959233    0.798291    0.143719    11.00000   -1.20000
AFIX   0
HKLF 4
 
REM  NKDH25R
REM R1 =  0.0604 for     953 Fo > 4sig(Fo)  and  0.0639 for all    1124 data
REM    109 parameters refined using      1 restraints
 
END  
     
WGHT      0.1041      0.0000 

REM Instructions for potential hydrogen bonds
EQIV $1 -x+1, y+1/2, -z
HTAB C1 F1_$1
EQIV $2 x, y+1, z
HTAB C1 F5_$2
HTAB C2 F5_$2
EQIV $3 -x+1, y+1/2, -z+1
HTAB C3 F3_$3
EQIV $4 x+1, y, z
HTAB C4 F2_$4
EQIV $5 -x+2, y+1/2, -z+1
HTAB C4 F4_$5
HTAB C5 F1_$4

REM Highest difference peak  0.376,  deepest hole -0.249,  1-sigma level  0.103
Q1    1   0.5102  0.9718  0.3020  11.00000  0.05    0.38
Q2    1   0.5101  0.7762  0.3464  11.00000  0.05    0.34
Q3    1   0.6981  0.7373  0.3267  11.00000  0.05    0.34
Q4    1   0.5890  0.6666  0.1146  11.00000  0.05    0.33
Q5    1   0.9578  0.2913  0.1716  11.00000  0.05    0.31
;
_shelx_res_checksum   80364

_shelx_hkl_file
;
   0   0   1  580.07   43.55
   0   0  -1  538.82   41.00
   0   0  -1  562.73   49.38
   0   1   0    0.89   37.35
   0  -1   0   25.82   46.73
  -1   0   010597.27  205.55
  -1   0   0 9490.60  224.56
   1   0   0 9864.76  225.92
   1   0   0 9949.64  185.55
   0   0  -217057.43  195.13
   1   0  -131632.10  453.89
   1   0   142656.98  326.13
   1   0  -2 2974.29  116.18
   1   0  -2 2929.17   83.61
  -1   0   2 2866.26   67.68
   1   0  -2 2914.58   87.97
   0   1  -2 3769.70  107.66
   0   1   2 3566.54   84.74
   0   1   2 3600.72   92.97
   0   1  -2 3394.86   89.54
   0  -1   2 3550.79  344.70
   0  -1  -2 3774.13  104.46
  -1  -1   114491.36  281.60
   1   1  -114916.03  221.63
   1   1  -114889.30  229.69
   1  -1   137849.80  390.97
   1   1   136427.75  266.32
  -1   1  -136339.12  474.10
   0   0   3 8221.82  200.60
   0   0  -3 8370.28  185.42
   0   0  -3 7616.75  119.30
   1   1  -2 7496.79  187.88
   1   1  -2 8282.79  213.33
   1  -1  -2 7941.19  140.69
   1   1  -2 7335.77  149.84
  -1   1   2 7962.13  150.04
  -1  -1  -2 1998.83   65.49
   1   1   2 1851.41   49.95
   1  -1   2 1973.49   85.68
  -1   1  -2 2089.29   94.53
   1   0  -3 9810.68  185.17
  -1   0   3 9349.89  138.21
   1   0  -3 9691.50  181.97
  -1   0   310170.61  233.26
   0  -1   324765.36  474.24
   0  -1   323841.60  322.76
   0   2   0 1611.41   83.75
   0  -2   0 1816.41   68.80
   1   0   3  154.37   23.73
  -1   0  -3  141.57   28.22
   0  -2   126846.81  825.26
   0   2   127739.60  304.13
  -2   0   0 2690.64   69.62
  -2   0   0 3056.48  132.45
  -1   1   3  578.19   69.74
   1   1  -3  645.00   69.49
   1  -1  -3  575.33  148.67
   1   1  -3  579.78   49.77
  -1  -1   3  669.73   46.75
   1   1  -3  568.46   34.39
  -2   0  -1  989.68   46.23
   2   0   1 1335.99   58.42
  -2   0  -1 1169.53   84.13
   0   0  -450597.85  446.84
   1  -2   0  989.51   64.40
  -1  -2   0 1201.54   63.74
   1   2   0  951.81   49.73
   1  -2   0  946.43   66.31
  -1   1  -334227.82  428.47
  -1  -1  -334130.71  419.70
   0  -2  -225597.71  313.56
   0   2   223489.94  257.68
   1   2  -117363.35  247.61
   1  -2  -118404.79  260.45
  -1  -2   118012.47  307.52
   1   2  -116934.48  263.41
   2   0  -2  174.83   37.18
  -2  -1   017482.70  345.39
   2   1   017734.43  356.23
  -2   1   019621.88  297.16
   1   2   1  598.00   35.02
   1  -2   1  604.68   51.77
  -1  -2  -1  686.79   42.13
   1  -2   1  536.82   86.90
  -2   1   129983.95  366.92
  -2  -1   132515.95  554.60
   2   1   1 5698.19  115.00
  -2   1  -1 5613.55  145.38
   0   1  -427617.38  366.10
   0  -1  -428110.11  319.66
   0  -1   426313.05  438.85
   0  -1   426180.25  319.86
   2   0   2  684.41   40.75
  -2   0  -2  674.12   53.87
   1  -2  -2 1440.53   69.63
   1   0   4  358.48   31.24
  -1   0  -4  277.41   39.37
  -2   1   214354.13  245.88
   2  -1  -215030.95  212.10
   1  -2   219187.81  643.45
   1   2   219778.36  218.55
  -1   1   4 2447.19   65.14
   1   1  -4 2528.95   91.56
   1  -1  -4 2604.38   92.30
  -1  -1   4 2646.64   84.07
   0  -2  -321190.14  267.45
   0   2   320137.67  222.54
   2   0  -3  806.16   48.58
  -2   0   3  759.99   38.19
   2   1   210781.45  157.04
  -2   1  -210451.94  211.22
   1   1   4 1596.24   52.20
   1  -1   4 1620.56   65.87
  -1  -1  -4 1626.23   72.76
  -1   1  -4 1511.27   70.05
  -2   0  -3 7380.89  235.59
   2   0   3 7616.46  144.15
  -1   2   313129.82  175.40
   1  -2  -313178.85  239.90
   0   0  -5 2323.23   83.07
   0   0   5 2261.53   71.47
  -2   1   3  742.53   39.30
   2   1  -3  838.77   57.77
   2  -1  -3  833.30   46.35
  -1  -2  -311769.57  178.53
  -1   2  -310322.37  393.87
   1   2   311252.86  144.63
  -2  -2   0 5389.85  196.97
   2  -2   0 5264.52  153.00
   2   2   0 5078.55  100.82
   1   0  -533970.31  393.08
  -1   0   533618.76  343.50
  -2  -2   1 3526.35  155.97
   2  -2  -1 3381.06   98.30
  -2   1  -3 2440.45  129.01
   2   1   3 2379.74   65.04
  -2  -1  -3 2508.35  129.84
   2  -1   3 2571.77  109.19
   0  -1  -5 8949.26  183.31
   0  -1   5 8435.52  167.40
   0   1  -5 8331.60  172.37
  -2   0   4 7152.58  121.02
   2   0  -4 7802.90  154.80
   2   2   1 7073.11  115.88
   2  -2   1 6833.53  191.13
  -2  -2  -1 7293.19  233.67
   0   2   4  326.70   23.00
   0  -3   0    1.06   16.02
  -1   0  -5 5107.62  131.55
   1   0   5 5456.44  105.04
   0  -3  -1 2166.74   88.61
  -1   1   5 6458.81  107.36
  -1  -1   5 6792.91  139.91
   1   1  -5 6043.95  185.74
   1  -1  -5 6704.29  146.19
   2  -1  -4   47.38   18.63
  -2   1   4   37.59   11.46
   2   1  -4   40.02   23.92
  -2  -2  -2 8934.46  213.52
   2   2   2 9055.39  134.50
   2   0   4 1344.02   64.07
  -2   0  -4 1356.85   82.79
  -3   0   0  418.08   57.34
  -1  -3   0 3243.35  114.85
   1  -3   0 3071.17  228.79
   1   3   0 2993.60  107.75
   1   1   5  297.87   22.84
   1  -1   5  287.47   27.21
  -1  -1  -5  232.63   31.11
  -1   1  -5  233.41   32.28
   0  -3  -2 3346.87   97.14
   0   3   2 3497.44   84.83
   1  -3  -1  542.26   78.05
   1   2   411777.30  150.17
   1  -3   1  586.99   82.41
  -1  -3  -1  607.18   45.08
   1   3   1  652.25   36.53
  -3   0  -1 2452.72  121.20
   3   0  -2  267.34   34.52
  -2   2   3 1996.84   78.03
  -2   1  -4 1197.59   95.12
  -2  -1  -4 1423.11   93.42
   2  -1   4 1223.09   73.06
   2   1   4 1264.55   52.12
  -3  -1   0  298.30   43.30
  -3  -1   1 8318.01  220.45
   0   0   613535.37  203.76
   0   0  -613730.45  217.19
   1  -3  -2  494.86   56.84
   2   0  -5  491.67   39.57
  -2   0   5  520.45   33.74
  -2   0   5  513.49   76.00
   1   3   2 9674.76  143.67
  -1  -3  -2 9182.55  185.41
  -3  -1  -1  143.08   91.09
  -3   1  -1  161.84   35.77
  -3  -1  -1  100.24   25.11
  -3   1  -1  147.46   23.82
  -3   0  -2 6709.55  214.80
  -3   0  -2 5882.31  134.05
  -2   2  -3 3006.30  240.28
   2   2   3 2927.63   78.88
  -2   2  -3 2933.75  110.83
  -2  -2  -3 3405.25  122.01
  -2   2  -3 2735.66  169.51
  -2   2  -3 2917.86  162.03
   0  -2  -5   72.14   17.96
   0  -2   5   89.76   25.95
   0   2   5   58.22   13.08
   0   3   3 6335.35  110.96
   0  -3   3 6476.80  211.12
   0  -3  -3 6469.22  141.63
  -3   1   2 5415.67  298.29
   3  -1  -2 6561.42  155.73
   3   1  -2 5582.55  155.14
  -3   1   2 6076.80  269.62
  -1   0   6 2269.42   69.09
   1   0  -6 2162.02   95.26
  -3   0   3   40.84   39.44
   3   0  -3   41.59   19.42
   0   1   610783.46  161.00
   0  -1   611207.62  314.63
   0  -1  -610967.96  203.12
   0  -1   611421.89  193.49
   0  -1  -610912.78  188.50
  -2  -1   5 3959.53  171.11
  -2  -1   5 3137.47  153.51
  -2   1   5 3225.79   76.80
  -2   1   5 3051.79   90.76
   2   1  -5 3264.41  138.51
   2  -1  -5 3371.37   91.00
  -2   1   5 3137.64  176.91
  -1  -2   5 1711.73  115.15
  -1   2   5 1800.12   55.04
  -1  -2   5 1824.15  123.23
   1  -2  -5 1723.62   70.04
  -1  -2   5 1819.41  131.02
  -3  -1  -2  835.53   56.50
  -3   1  -2  933.57   77.59
  -3  -1  -2  897.18   43.98
  -3   1  -2  949.79   75.46
  -1  -3   3  552.03   67.63
  -1  -3   3  506.49   61.37
   1  -3  -3  531.26   45.49
   1   0   6   29.82   14.63
  -1   0  -6   37.29   11.50
  -1   0  -6   28.77   12.01
  -1   0  -6   15.23   16.52
   1   0   6   14.79   18.44
  -2   2   4 2312.44   88.12
  -2   2   4 2336.31   91.08
  -2  -2   4 2346.25  112.42
  -2   2   4 2115.18  123.87
  -2  -2   4 2336.02  162.95
   1  -1  -6 2657.60   84.90
  -1  -1   6 2872.05  196.09
   1  -1  -6 2587.64  112.50
  -1  -1   6 2645.85  109.59
  -1   1   6 2439.47   65.12
  -1   1   6 2784.72   68.90
  -1  -1   6 2859.55   97.09
  -1  -1   6 2761.89  135.72
  -2   0  -5 1405.91   72.84
   2   0   5 1424.31   65.73
  -2   0  -5 1356.14   85.30
  -2   0  -5 1504.10  109.24
  -1  -3  -3  243.74   28.49
   1   3   3  234.41   19.56
  -1  -3  -3  213.34   25.51
   3  -1  -3  926.58   60.15
   3   1  -3  968.86   74.12
  -3  -1   3  848.17  111.42
  -1  -2  -5 1779.36   75.62
   1  -2   5 1754.17  151.09
   1   2   5 1867.39   59.73
  -1   2  -5 1724.95  171.23
  -1  -2  -5 1757.09   60.20
  -3   0  -3  632.74   38.31
  -3   0  -3  671.21   36.40
   3   0   3  612.11   66.92
  -3   0  -3  687.95   60.45
  -3   0  -3  733.57   78.68
  -2   3   0 4193.87  186.26
   2  -3   0 3759.95  151.43
  -2  -3   0 4099.08  174.42
  -2  -3   0 4014.38  140.08
  -2  -3   0 4664.62  145.90
  -2  -3   0 3816.62  136.21
  -2   3   0 4237.46  152.36
  -2  -3   1  183.99   38.14
  -2   3   1  183.31   31.05
   2  -3  -1  173.93   26.47
  -2   3   1  240.25   39.22
   1   1   6 4234.65  103.12
  -1  -1  -6 4235.08  138.05
   1   1   6 4194.82   96.75
   1  -1   6 4184.44  176.39
  -1  -1  -6 3652.88  106.39
  -1  -1  -6 4132.76  107.24
  -2  -3  -1 9946.15  251.84
  -2  -3  -110634.93  279.89
   2  -3   1 9654.95  253.47
  -2   3  -110416.55  314.68
  -2  -3  -110397.14  218.39
   2   1   5 1173.87   51.68
   2  -1   5 1210.69  158.68
  -2   1  -5 1198.94   84.04
  -2   1  -5 1176.18   74.92
   2   1   5 1264.75   53.57
   2  -1   5 1161.96   72.65
  -2   1  -5 1110.24   82.08
  -2  -1  -5 1259.73   89.03
  -2   1  -5 1208.44   95.64
  -2  -1  -5 1220.69   76.15
  -2   1  -5 1189.23   70.07
  -2  -1  -5 1234.99   66.62
   0   3   4 3350.27   73.96
   0  -3   4 3352.38  250.25
   0  -3  -4 3484.43  105.59
   0  -3  -4 3293.39   90.29
   2   2   4   76.60   17.01
  -2   2  -4   80.76   45.96
  -2   2  -4   83.47   22.25
  -2  -2  -4   81.24   23.40
  -2   2  -4   73.29   23.50
  -2  -2  -4   81.77   15.66
   2   2   4   85.78   15.56
  -2  -2  -4   78.38   16.14
  -3   2   0 1655.42   86.24
  -3   2   0 1809.50  111.22
  -3  -2   0 2262.87  122.29
   3  -2   0 2057.15   88.24
  -3  -2   0 1811.31  140.69
   3   0  -4   92.03   19.80
  -3   0   4   72.99   35.17
  -3   0   4   84.67   25.04
  -3   2   1  582.30   69.69
  -3  -2   1  623.98   63.34
  -3  -2   1  635.42   64.36
   3  -2  -1  643.52   52.36
  -3  -2   1  662.72   77.84
  -3   2   1  678.47   60.77
  -2  -3   2  659.42   63.63
  -2  -3   2  614.09   60.74
  -2   3   2  540.54   64.59
  -2   3   2  550.11   58.44
   2  -3  -2  601.80   52.84
  -3   1  -3  267.58   46.10
  -3  -1  -3  291.21   28.47
  -3   1  -3  255.55   29.46
  -3   1  -3  244.29   53.13
  -3   1  -3  260.28   33.06
  -3  -1  -3  246.71   29.74
  -3  -1  -3  239.92   31.24
  -3  -2  -1 2627.43  140.63
  -3  -2  -1 2769.05  150.79
   3  -2   1 2643.11  115.09
  -3   2  -1 2660.29  154.40
  -3  -2  -1 2527.67  156.33
  -3  -2  -1 2478.49   86.56
  -3   2  -1 2391.02  118.98
  -2   0   6  754.52   73.62
   2   0  -6  716.94   44.70
  -2   0   6  792.05   89.20
   1  -3  -4  248.30   31.42
  -1   3   4  290.34   22.77
  -1  -3   4  273.79   63.08
  -1  -3   4  257.04   59.34
  -1  -3   4  226.75   50.14
  -3   2   2 1347.18  107.60
  -3  -2   2 1334.42   94.82
  -3   2   2 1415.77   90.77
  -3   2   2 1076.52   67.04
  -3   2   2 1313.49   81.51
   3  -2  -2 1310.00   60.48
  -3  -2   2 1221.77   81.24
  -2   3  -2 2159.51  162.81
  -2  -3  -2 1964.90  105.62
  -2  -3  -2 1966.60  115.70
  -2  -3  -2 2050.63   76.36
  -3   1   4  631.20   87.51
  -3  -1   4  561.95   85.34
   3   1  -4  634.18   53.11
  -3  -1   4  585.01   71.08
  -3  -1   4  598.52   63.83
   3  -1  -4  661.23   49.28
   0  -2  -6  204.89   25.68
   0  -2  -6  217.67   22.39
   0  -2   6  191.82   51.04
   0  -2   6  214.53   35.09
   0   2  -6  192.12   47.78
   0   0   7 2689.57  104.57
   0   0  -7 2601.05   95.31
   0   0  -7 2491.28  100.17
   0   0   7 2700.86   80.99
   1  -3   4  231.69   50.58
  -1  -3  -4  262.38   28.90
  -1  -3  -4  256.30   28.85
   1   3   4  259.73   20.85
  -1  -3  -4  246.86   25.18
  -2  -2   5 2034.47  142.11
  -2  -2   5 2507.57  123.71
   2  -2  -5 2439.22   80.32
  -2   2   5 2427.24  150.26
  -2  -2   5 2291.03  139.89
  -2   2   5 2567.99   87.37
  -2   2   5 2534.07   85.69
  -3  -2  -2 2224.58   97.06
  -3  -2  -2 2136.60   67.83
  -3   2  -2 2458.19  148.43
  -3   2  -2 2515.58  130.79
  -3  -2  -2 2378.42  116.72
   2  -1  -6  902.08   51.01
  -2   1   6  842.27   38.75
  -2  -1   6  926.30   70.33
  -2   1   6  870.21   95.66
  -2   1   6  878.43   97.80
  -2  -1   6  987.55   86.12
  -2   3   3  797.83   53.21
  -2   3   3  769.04   63.26
  -2   3   3  722.16   59.21
  -2  -3   3  830.45   74.86
  -2  -3   3  751.41   75.08
   2  -3  -3  814.69   52.00
  -1   0   7  187.67   45.40
   1   0  -7  163.97   24.66
  -1   0   7  211.10   23.44
  -1   0   7  197.02   80.18
  -3   0  -4  818.62   60.42
  -3   0  -4  949.97  103.48
   3   0   4  746.91   60.82
  -3   0  -4 1085.55   44.23
  -3   0  -4  975.35   60.19
  -3   0  -4  965.99   45.62
  -1  -2   6 3617.18  215.41
  -1  -2   6 3621.96  180.29
  -1   2   6 3736.45   74.06
  -1  -2   6 3738.41  160.22
   1  -2  -6 3452.33   97.41
   0  -4   0 1197.25   89.01
  -3  -2   3  135.61   28.99
  -3  -2   3   98.99   51.30
  -3   2   3  179.13   35.64
  -3   2   3  148.41   26.46
  -3  -2   3  137.68   34.19
  -3   2   3  196.31   38.78
   0  -1  -7 2649.76   81.98
   0  -1  -7 2343.06  103.66
   0  -1   7 2692.07  180.91
   0  -1   7 2498.03  109.28
   0   1   7 2786.63   88.40
   0   1   7 2608.34   77.98
   0  -1   7 2498.06   88.56
   0   4   1  298.04   26.94
   0  -4   1  361.84   49.76
   0  -4  -1  358.57   43.69
  -2   0  -6 2710.62  131.54
  -2   0  -6 2963.97  119.80
   2   0   6 2629.30   90.71
  -2   0  -6 2822.09   82.03
  -3   0   5 3835.52  131.85
  -3   0   5 3766.58  184.81
  -3   0   5 3616.37  201.17
   3   0  -5 3855.23  133.43
  -2  -3  -3  997.07   69.67
  -2  -3  -3  941.27   81.44
   2   3   3 1118.97   44.40
  -2   3  -3 1115.04  112.48
  -2  -3  -3  950.76   46.62
  -1   2  -6 6156.44  232.70
   1  -2   6 6133.97  242.18
   1   2   6 6353.73  207.85
   1   2   6 6273.04  109.36
  -1  -2  -6 6052.17  183.78
  -1  -2  -6 5967.43  127.25
   1  -2   6 6088.07  229.91
   0  -3  -5  356.38   27.29
   0  -3  -5  407.18   36.16
   0   3   5  421.29   26.17
   0  -3  -5  385.60   33.56
   0  -3   5  370.37   70.71
   0  -3   5  414.19   61.83
   0   3  -5  347.97   86.11
   1  -1  -7 2851.69   81.14
  -1   1   7 2924.57   82.83
  -1  -1   7 2725.90   96.24
  -1   1   7 2664.17   70.87
  -1  -1   7 2825.25  112.76
   1  -1  -7 2558.18   97.87
  -1  -1   7 2914.93  137.31
  -1  -1   7 2713.57  190.32
   1   0   7  629.65   40.64
   1   0   7  654.48   58.46
  -1   0  -7  630.41   50.21
  -1   0  -7  596.06   46.05
  -1   0  -7  630.93   53.31
  -3   1  -4 2015.98  123.61
  -3  -1  -4 2199.89   64.60
  -3  -1  -4 2098.81  130.16
  -3   1  -4 2131.06   77.27
  -3  -1  -4 1901.09   67.69
  -3   1  -4 2256.06  112.21
  -3  -1  -4 2228.23   90.37
  -3   1  -4 2215.98   95.03
  -3   1  -4 1834.96  182.10
  -2   2  -5 1753.52  113.14
  -2  -2  -5 1973.37   70.83
   2   2   5 1924.85   65.26
   2   2   5 1846.24   63.61
  -2  -2  -5 1743.75   66.66
  -1  -4   0  633.56   53.40
  -1   4   0  632.85   55.18
   1   4   0  597.77   45.00
   1  -4   0  744.50   78.17
  -1  -4   0  703.03   64.33
   0  -4   2 1640.17  115.60
   0   4   2 1520.47   54.17
  -1  -4   1 6216.47  171.96
   1  -4  -1 7058.76  276.48
  -1   4   1 5611.63  186.21
  -1  -4   1 6475.04  263.99
  -3  -2  -3 1893.32   80.99
  -3   2  -3 2028.45  114.25
  -3  -2  -3 1989.05   84.15
  -3   2  -3 2211.69   90.55
  -3  -2  -3 1986.39  135.46
  -3  -2  -3 2306.27   69.13
  -3   2  -3 2262.08  108.24
  -2   1  -6 1087.79   76.18
   2  -1   6 1054.72  130.92
  -2   1  -6 1246.29   80.51
  -2  -1  -6 1124.25   67.48
  -2  -1  -6 1120.29   99.87
  -2   1  -6 1189.54   71.10
   2   1   6 1092.04   48.88
   2  -1   6  988.32   70.02
   1   4   1  871.52   45.63
   1  -4   1  912.16  105.16
  -1   4  -1  844.28   71.45
  -1  -4  -1  923.79   64.71
   1  -3  -5 2433.01   80.48
  -1  -3   5 2270.38  186.26
  -1  -3   5 2228.95  139.03
  -1   3   5 2641.44   62.15
  -1  -3   5 2404.09  169.45
   3  -1  -5 2508.67   90.15
  -3  -1   5 2855.99  211.72
  -3  -1   5 2793.90  134.53
  -3   1   5 2655.36  166.20
  -3   1   5 2756.26   95.78
  -4   0   0 2609.63  136.43
  -4   0   0 3122.29   67.89
  -4   0   1  387.46   70.11
  -4   0   1  440.78   23.87
   4   0  -1  348.02   43.39
  -1  -1  -7  719.28   43.88
   1   1   7  731.12   41.76
  -1   1  -7  663.07   69.96
   1  -1   7  830.71   90.92
   1   1   7  699.01   61.57
  -1  -1  -7  752.56   58.47
   1   1   7  697.65   39.07
  -1  -1  -7  694.86   47.57
  -2  -3   4  127.86   39.62
   2  -3  -4  155.04   31.40
  -2   3   4  172.12   38.72
  -2   3   4  174.56   21.23
  -2  -3   4  149.57   41.07
  -3  -2   4 1626.88  107.56
  -3   2   4 1645.96  109.99
  -3  -2   4 1986.24  114.47
  -3  -2   4 1686.68  151.20
  -3   2   4 1826.27   81.63
  -1   4   2 3307.76   89.31
  -1  -4   2 3590.90  156.24
  -1  -4   2 3454.69  145.52
   1   3   5 5107.24   90.34
  -1  -3  -5 4839.29  115.81
   1  -3   5 5170.14  317.19
  -1  -3  -5 4994.02  103.75
  -1  -3  -5 5320.43  123.11
  -1   3  -5 5535.56  307.07
  -4   0  -1   83.55   12.27
  -4   0  -1   61.95   43.82
  -4   0  -1   57.56   19.41
  -4   0   2  479.02   29.89
  -4   0   2  446.13  106.29
   4   0  -2  543.61   55.39
  -1  -4  -2   37.96   22.76
   1   4   2   41.59   13.39
   1  -4   2   26.78   34.23
  -1  -4  -2   40.60   19.88
  -1   4  -2   40.94   17.17
  -2   0   7  313.94   43.81
  -2   0   7  326.40   53.51
  -2  -2   6 1746.35  102.76
   2  -2  -6 1693.90   66.84
  -2   2   6 1651.49  142.77
  -2   2   6 1942.93  104.76
  -2  -2   6 1701.71  116.55
  -4  -1   0 3225.16  223.55
  -4   1   0 3033.11  130.53
  -4   1   0 3389.82   84.49
  -4   1   0 3086.45  159.00
  -4  -1   0 3377.60   83.35
  -4   1   1 2191.18   60.30
  -4  -1   1 2457.75   75.95
  -4   1   1 2221.25  120.59
  -4   1   1 2384.72  148.46
   4  -1  -1 2414.67  105.31
   0   4   3 1645.08   54.69
   0  -4  -3 1535.60   66.95
  -3   0  -5   51.79   25.68
  -3   0  -5   66.23   12.88
  -3   0  -5   65.71   20.58
   3   0   5   44.64   20.43
  -2   3  -4  247.01   44.10
  -2  -3  -4  225.87   24.09
  -2   3  -4  220.76   53.37
  -2  -3  -4  256.24   26.30
  -2  -3  -4  218.50   39.31
   2   3   4  233.85   20.38
   3  -3   0 1730.06   79.33
  -3  -3   0 2159.99  100.70
  -3   3   0 2044.06  101.07
  -3   3   0 1990.35  108.90
  -3  -3   0 2028.22   99.22
  -3  -3   0 1642.70   73.40
  -3   3   1  607.96   61.51
   3  -3  -1  521.19   45.84
  -3   3   1  465.64   68.96
  -3  -3   1  674.38   64.60
  -3   3   1  732.64   75.10
   0  -2   7 4488.35  204.31
   0  -2  -7 5324.71  102.77
   0  -2  -7 5061.95  117.21
   0   2  -7 4835.56  197.48
   0  -2   7 4355.12  174.06
  -4  -1  -1 2210.30   82.68
  -4   1  -1 2204.68  163.51
  -4   1  -1 2505.38  120.91
  -4   1  -1 2585.39   75.89
  -4  -1  -1 2195.29  235.00
  -4   1   2 1330.03   52.88
  -4  -1   2 1071.98  153.02
  -4   1   2 1345.28  119.97
   4  -1  -2 1323.15   72.68
   4   1  -2 1215.75   90.99
  -4   1   2 1459.56  117.54
  -4  -1   2 1440.50   51.17
  -3  -3  -1 5407.42  152.64
  -3   3  -1 4829.93  155.59
  -4   0  -2  240.51   28.95
  -4   0  -2  242.72   32.91
  -4   0  -2  222.82   70.70
  -2   1   7  726.86   89.81
  -2   1   7  678.22   79.37
  -2  -1   7  695.19   63.52
  -2  -1   7  701.85   71.33
   2  -1  -7  617.54   59.86
   4   0  -3 2614.54  104.20
  -4   0   3 2885.31  207.42
  -1  -4   3 1372.83   93.85
  -1  -4   3 1360.53  102.22
   1  -4  -3 1212.74   66.45
   3  -3  -2  135.51   24.54
  -3   3   2  135.91   34.80
  -3  -3   2  179.81   34.11
  -3   3   2  131.80   31.08
  -3   3   2  137.39   24.75
  -1   2   7  337.37   23.01
  -1  -2   7  328.23   52.27
  -1  -2   7  290.61   47.32
  -1   2   7  331.62   23.33
   1  -2  -7  256.93   28.32
   1  -2  -7  290.38   28.06
  -3   2  -4  233.80   46.19
  -3   2  -4  272.36   29.73
  -3  -2  -4  219.01   42.68
  -3  -2  -4  233.90   25.05
  -3  -2  -4  241.12   29.17
  -3   2  -4  260.60   47.39
  -3   2  -4  249.70   36.23
  -3  -1  -5  136.85   24.17
  -3  -1  -5  119.37   36.38
  -3  -1  -5  109.76   18.68
  -3   1  -5   95.92   61.28
  -3   1  -5  136.11   20.97
  -3   1  -5  146.91   28.14
  -3   1  -5  139.47   31.58
   3  -1   5   98.94   34.70
   0   0   8 1181.52   68.15
   0   0   8 1003.88   50.86
   0   0  -8  947.29   66.43
  -3   0   6 1016.17  109.18
  -3   0   6  816.64   64.67
   3   0  -6  810.02   72.23
  -3   0   6 1039.94  154.28
   1   4   3 1388.49   47.64
  -1  -4  -3 1396.37   64.66
  -1  -4  -3 1206.04   65.13
   1  -4   3 1613.45  128.79
   0   3  -6  895.63  119.39
   0   3   6 1079.59   42.18
   0  -3  -6  891.61   51.16
   0  -3   6  831.24  128.47
   0  -3   6  953.94   82.55
  -1   0   8 1951.21  122.96
  -1   0   8 2114.88   90.89
  -1   0   8 1846.86  140.43
  -1   0   8 1909.37   68.98
   2  -4   0  104.59   42.33
  -2  -4   0   85.92   41.72
  -2   4   0   80.38   22.86
  -2  -4   0   90.80   26.48
  -2  -4   0   85.72   23.23
  -2  -3   5  223.58   43.74
  -2   3   5  150.93   45.18
   2  -3  -5  179.95   35.26
  -2  -3   5  129.06   38.82
  -2   3   5  160.26   19.96
   2   2   6 2489.13   78.70
  -2  -2  -6 2265.55  111.57
  -2  -2  -6 2518.63   71.76
  -2  -2  -6 2521.85   78.94
  -2   2  -6 2363.93  123.16
   2   2   6 2295.34   66.97
  -4   1  -2  191.65   33.73
  -4   1  -2  152.20   81.82
  -4  -1  -2  187.35   28.80
  -4  -1  -2  162.97   66.25
  -4  -1  -2  168.57   30.54
  -4   1  -2  198.93   57.82
  -4  -1  -2  228.47   23.78
  -2  -4   1  857.04   70.70
  -2  -4   1  997.99   67.27
  -2   4   1  855.63   63.62
   2  -4  -1  920.24   84.51
  -2  -4   1 1030.86   86.36
  -2   0  -7  947.60   48.37
   2   0   7  751.13   53.36
  -2   0  -7  966.28   65.42
  -2   0  -7  718.77   84.57
  -3  -2   5  645.77   80.31
  -3   2   5  638.31   43.65
  -3  -2   5  679.84   76.39
  -3   2   5  704.80   80.84
   3  -2  -5  532.01   45.28
  -3  -3  -2 4221.61   98.27
  -3  -3  -2 4165.58  121.08
  -3   3  -2 4659.52  161.98
  -3  -3  -2 3936.54  179.87
  -3   3  -2 4537.84  181.12
  -4  -1   3  359.54   67.63
  -4  -1   3  447.62   29.65
   4  -1  -3  418.30   49.69
  -4   1   3  477.37   74.75
  -4  -1   3  504.47  103.90
   1   2   7   51.06   13.92
   1  -2   7   41.48   31.99
   1  -2   7   34.18   23.67
   1   2   7   47.28   11.81
  -1  -2  -7   40.80   19.82
  -1  -2  -7   48.14   14.24
   1  -2   7   41.67   38.71
  -1  -2  -7   51.65   12.57
  -1   2  -7   47.34   25.51
  -1  -3   6 1144.10  112.97
   1  -3  -6  992.13   52.93
  -1  -3   6  850.25  109.06
  -1  -3   6  950.10   76.09
  -1   3   6 1048.44   42.04
   0  -1   8 1356.85  130.77
   0  -1  -8 1450.77   62.84
   0   1   8 1423.24   58.50
   0   1   8 1346.95   54.35
   0  -1   8 1249.41   76.52
   0  -1  -8 1201.19   81.89
   0  -1   8 1471.51   83.90
  -3   1   6 2447.71  159.70
  -3   1   6 2586.90   97.67
  -3   1   6 2194.15  131.03
   3  -1  -6 2338.65  121.84
  -3  -1   6 2325.48  116.04
  -3  -1   6 2218.85  120.99
  -2   4  -1 1060.64  105.22
  -2  -4  -1 1068.81   76.38
   2  -4   1 1149.71  109.64
  -2  -4  -1 1091.85   75.49
  -2   4  -1 1241.04   65.34
   0  -4  -4  129.23   24.26
   0   4   4  117.04   15.30
   0  -4   4  114.37   41.49
   0  -4  -4  103.71   24.17
   3  -3  -3 1940.57  101.59
  -3  -3   3 2093.81  130.26
  -3   3   3 2441.59  155.51
  -3   3   3 2126.35  111.77
  -1  -1   8  519.37   66.79
   1  -1  -8  445.23   48.75
  -1   1   8  539.93   36.77
  -1  -1   8  579.49   71.89
   1  -1  -8  538.52   40.20
  -1   1   8  531.72   37.79
  -2  -4   2 2117.30  118.50
  -2   4   2 2192.06  131.00
  -2   4   2 1758.74   84.00
  -4   0  -3  186.17   17.86
  -4   0  -3  177.02   21.81
  -4   0  -3  190.78   31.77
  -4   0  -3  136.84   66.31
   1   0   8   48.72   27.29
  -1   0  -8   49.55   16.30
  -1   0  -8   51.27   15.84
  -4   0   4  379.67   73.92
   4   0  -4  354.04   38.35
  -4   0   4  432.53   45.27
  -2  -1  -7  412.87   38.81
  -2  -1  -7  312.02   47.16
  -2   1  -7  392.57   43.43
   2  -1   7  328.54   65.31
  -2  -1  -7  392.91   29.00
   2   1   7  326.60   32.51
   2  -1   7  257.41   40.81
  -1  -3  -6  401.59   37.08
   1   3   6  399.00   28.27
  -1  -3  -6  434.64   33.41
   1  -3   6  487.77   70.45
  -1  -3  -6  470.87   35.52
  -1   3  -6  489.24   87.01
  -4  -2   0  713.87   46.79
  -4  -2   0  511.90   68.27
  -4   2   0  623.57   70.71
  -4   2   0  683.11   60.63
   4  -2   0  612.78   61.02
  -4   2   0  703.22   54.38
  -4  -2   0  757.93   95.66
   4  -2  -1 1144.74   77.89
  -4  -2   1 1310.94   68.79
  -4   2   1 1312.11  129.38
  -4   2   1 1390.63   97.90
  -4  -2   1 1020.97  104.38
  -4   2   1 1343.79   75.24
   1  -4  -4  403.31   38.63
   1  -4  -4  401.12   49.86
  -1  -4   4  492.37   67.14
  -1  -4   4  430.91   64.44
   2   3   5 3788.98  136.46
  -2   3  -5 3341.92  167.34
  -2  -3  -5 3737.93  136.24
  -2   3  -5 3340.87  203.22
  -2  -3  -5 3086.00  142.27
  -2  -3  -5 3580.42  132.05
   2  -4   2  680.88  102.21
  -2  -4  -2  706.14   63.39
  -2   4  -2  625.84   90.74
  -2  -4  -2  682.13   53.24
  -2   4  -2  773.86   60.33
   4  -2   1  270.73   45.23
  -4  -2  -1  272.70   26.57
  -4  -2  -1  269.59   56.93
  -4   2  -1  323.09   31.29
  -4  -2  -1  308.11   27.72
  -4   2  -1  252.83   53.41
  -4   2  -1  335.91   44.80
  -1  -4  -4  633.32   45.57
  -1  -4  -4  594.26   43.54
  -4   1  -3   98.06   21.59
  -4  -1  -3  135.62   15.76
  -4  -1  -3  116.39   23.95
  -4  -1  -3   91.12   28.68
  -4   1  -3  119.62   17.02
  -4   2   2  717.97   57.76
  -4  -2   2  472.46   68.60
  -4  -2   2  707.71   47.99
  -4   2   2  628.96   67.63
  -3   3  -3  882.26   79.66
  -3  -3  -3  841.67   58.36
  -3  -3  -3  692.43   71.94
  -3  -3  -3  854.65   49.76
  -3   3  -3  851.60   97.59
  -3   0  -6   53.80   12.29
  -3   0  -6   72.34   14.90
  -3   0  -6   56.78   18.71
   3   0   6   34.75   21.07
  -3   0  -6   62.32   16.01
   1   1   8 3296.64  206.49
  -1   1  -8 3256.27  161.61
   1  -1   8 3239.15  176.00
  -1  -1  -8 3083.24  125.90
  -1  -1  -8 3657.07  149.27
  -1   1  -8 3889.79  167.24
  -4  -1   4  260.59   76.62
  -4  -1   4  294.12   44.38
  -4  -1   4  223.78   53.19
  -2   2   7 2054.97  143.50
  -2  -2   7 2001.70  154.51
  -2   2   7 1980.64   83.40
  -2  -2   7 2193.69  147.50
  -2   2   7 1971.71  182.83
  -2  -2   7 2008.51  139.31
  -2   4   3 1172.86   88.14
  -2  -4   3 1156.95   92.18
  -2  -4   3 1128.98   88.17
  -3   2  -5  311.35   32.94
  -3   2  -5  308.05   35.55
  -3  -2  -5  313.53   28.40
  -3   2  -5  272.69   93.59
  -3  -2  -5  314.34   32.78
  -3   2  -5  288.82   47.33
  -3   3   4  603.68   48.54
  -3  -3   4  538.47   61.11
  -3   3   4  566.98   72.07
  -2   0   8 2041.30  144.57
  -2   0   8 1860.97  129.18
  -3   1  -6  702.86   64.48
  -3  -1  -6  834.19   54.57
  -3   1  -6  784.39   63.21
  -3   1  -6  773.77   52.15
  -3  -1  -6  782.77   52.73
  -3  -1  -6  627.66   44.49
  -4   2  -2  227.62   50.31
  -4   2  -2  267.72   29.61
  -4  -2  -2  251.23   24.03
  -4  -2  -2  227.36   27.28
  -3   0   7   13.86   41.04
  -3   0   7   25.58   29.77
  -2  -4  -3  458.03   53.31
  -2   4  -3  497.96   56.11
   2  -4   3  495.35   87.03
  -2   4  -3  347.43   85.25
  -4   2   3  122.30   25.49
  -4  -2   3   82.53   34.83
  -4  -2   3  128.54   21.36
  -4  -2   3   78.67   45.63
  -2  -3   6  580.46   80.59
  -2  -3   6  592.40   66.32
   0  -4  -5  669.49   48.47
   0  -4   5  678.75   88.18
   0  -4  -5  729.74   53.54
   0  -2   8 6361.78  228.69
   0   2  -8 6529.88  243.64
   0  -2   8 6180.29  284.64
   0  -2  -8 6541.79  147.02
   0   2   8 6139.24  202.20
  -3  -2   6 2625.95  174.70
  -3   2   6 2255.18  164.61
  -3  -2   6 2669.12  148.50
  -4   0  -4   39.73   11.14
  -4   0  -4   36.96   12.62
  -4   0  -4   39.46   16.13
  -4   0   5  217.43   56.89
  -4   0   5  202.11   27.94
  -2   1   8 1097.82  115.05
  -2  -1   8 1323.14  102.70
  -2  -1   8 1136.10  110.49
  -2  -1   8 1169.05   78.14
  -2   1   8 1123.34  103.71
   0   3  -7 1065.06  122.83
   0  -3   7 1217.46  109.39
   0  -3   7  732.23  126.97
   0  -3  -7 1053.07   53.46
  -1   2   8  488.94   33.87
  -1  -2   8  525.07   69.54
   1  -2  -8  540.97   38.22
  -1  -2   8  515.80   65.24
  -1  -4   5  599.62   80.20
  -1  -4   5  574.59   81.33
  -2   2  -7  601.82   73.61
  -2   2  -7  727.04   73.48
  -2   2  -7  668.34   71.48
  -2  -2  -7  677.00   42.53
  -2  -2  -7  748.12   43.16
   2   2   7  629.87   42.63
  -3  -1   7  706.08   95.07
  -3  -1   7  586.14   64.89
  -3   1   7  657.91  101.83
  -3  -1   7  618.15   67.50
  -3   1   7  541.66   82.07
  -1  -3   7  257.71   51.52
  -1  -3   7  213.83   47.12
   1  -3  -7  233.70   25.15
  -3  -3  -4   41.57   14.31
  -3   3  -4   46.82   23.31
  -3   3  -4   54.04   20.29
  -3  -3  -4   39.58   14.19
  -2  -4   4  373.43   54.13
  -2  -4   4  398.98   54.52
  -2   4   4  413.42   56.33
  -4  -1  -4 1217.86   70.30
  -4  -1  -4 1125.59   89.92
  -4  -1  -4 1189.13   64.96
  -4   1  -4 1297.57   66.56
   0  -5   0   -7.23   24.91
  -4  -1   5  415.64   84.14
  -4  -1   5  368.25   68.94
  -4  -1   5  381.86   49.88
  -4   1   5  443.69   46.59
  -4   1   5  366.09   62.54
   0   0  -9  777.08   57.93
   0   0   9  834.79  102.53
   0   0   9  865.33   70.71
   1  -4   5 1318.63  123.89
  -1  -4  -5 1463.72   76.07
   0  -5   1 1361.12  101.48
   0  -5  -1 1133.52   93.61
  -4   2  -3    2.44   24.29
  -4  -2  -3    8.88    9.89
  -4  -2  -3    6.50   11.61
  -2   0  -8  930.01   59.98
  -2   0  -8  941.77   56.32
  -2  -3  -6 1286.66   61.48
   2   3   6 1117.55   56.48
  -2   3  -6 1310.97  119.87
  -2  -3  -6 1229.04   58.81
   2  -3   6 1455.16  127.43
  -2   3  -6 1231.46  100.95
  -2   3  -6 1133.28  107.55
  -1   2  -8 1869.11  129.30
   1   2   8 1716.71   90.31
   1  -2   8 1659.21  137.06
  -1  -2  -8 1843.40   83.69
  -1  -2  -8 1503.06   67.66
  -4  -2   4  110.53   46.57
  -4  -2   4  117.54   37.91
  -4   2   4  144.10   25.37
  -4   2   4  166.58   47.61
  -4  -2   4  134.05   20.06
  -1   0   9  142.87   45.83
  -1   0   9  136.39   29.99
  -1   0   9   96.21   39.29
  -3  -3   5  218.34   43.71
  -3  -3   5  198.66   38.30
  -3   3   5  211.34   43.34
  -1   3  -7  413.91   68.39
  -1  -3  -7  409.37   32.00
   1  -3   7  314.49   65.05
  -1  -3  -7  381.72   30.83
   1   3   7  407.05   29.95
  -2  -4  -4   32.50   12.66
  -2  -4  -4   39.47   16.31
   2  -4   4   27.87   46.12
  -3  -4   0  195.05   27.73
   3  -4   0  212.47   55.80
  -3  -4   0  257.30   39.82
  -3   4   0  221.64   33.30
  -3  -4   1  389.88   46.88
  -3  -4   1  385.22   41.73
  -3   4   1  501.01   53.01
  -1   5   0  108.62   21.30
  -1  -5   0  111.01   33.98
   1  -5   0  107.34   38.96
   0  -1  -9  983.24   58.38
   0  -1   9  969.06   98.79
   0  -1   9 1166.53   93.79
   0   1   9  929.58   81.31
   0   1  -9 1086.02   89.88
   0   5  -2  185.79   35.26
   0  -5   2  165.40   38.47
   0  -5  -2  164.10   35.22
   1  -5  -1  595.63   69.11
  -1  -5   1  580.01   62.16
   2  -1   8  971.50  139.70
  -2  -1  -8 1053.21   75.37
  -2  -1  -8 1152.14   66.37
  -2   1  -8 1104.21   78.25
  -3   2  -6   34.17   25.79
  -3   2  -6   23.64   28.46
  -3   2  -6   27.25   20.20
  -3  -2  -6   31.79   14.71
  -3  -2  -6   31.63   11.70
  -1   5  -1  497.60   60.88
   1  -5   1  452.28   69.17
  -1  -5  -1  425.36   52.01
  -3  -4  -1 1114.11   68.02
  -3   4  -1 1127.90   66.78
   3  -4   1 1037.78  102.20
  -3   4  -1 1186.82   99.45
  -3  -4  -1 1256.32   82.60
  -1  -1   9 1168.84  103.08
   1  -1  -9  956.26   80.60
  -3   0  -7   14.90   17.27
  -3   0  -7    6.27   14.28
  -3   0  -7    9.08   13.79
  -4   3   0   62.59   23.06
  -4   3   0   47.41   24.75
  -4   3   1   12.41   21.54
  -4  -3   1   34.07   50.60
  -3  -4   2  796.46   73.20
  -3  -4   2  662.12   68.74
  -3   4   2  704.71   60.16
   1   0   9  326.42   54.00
   1   0   9  327.14   59.59
  -1   0  -9  337.29   39.22
  -4   0  -5  154.29   20.11
  -4   0  -5  133.93   18.39
  -4   0  -5  154.02   24.36
  -2  -2   8  310.58   46.33
  -2   2   8  277.91   30.63
  -2   2   8  269.19   50.32
   2  -2  -8  270.61   30.30
  -2  -2   8  357.05   49.61
   0  -4   6  153.49   55.73
   0  -4  -6  163.53   21.26
   0  -4  -6  163.21   22.80
  -4   0   6  751.59   91.67
  -4   0   6  943.66   66.11
  -1  -5   2  463.72   65.60
  -1  -5   2  525.63   59.84
  -4   3  -1  337.32   43.91
  -4  -3  -1  364.23   29.66
  -4  -3  -1  407.55   34.16
  -4   3  -1  408.87   51.46
  -4   3  -1  407.21   54.42
  -4  -3   2  663.12   78.37
  -4   3   2  829.64   83.27
  -4  -3   2  738.64   52.98
  -4   3   2  608.31   61.54
  -2  -4   5  687.36   93.39
  -2  -4   5  847.05   81.14
  -1   5  -2 1063.05   75.73
  -1  -5  -2  903.45   84.07
  -1  -5  -2  948.74   68.14
   1  -5   2  888.99   82.32
  -2  -3   7 1559.36  141.57
  -2  -3   7 1504.48  108.27
  -3   2   7 1935.39  141.22
  -3   2   7 2468.79  194.38
  -3   4  -2 1812.74  127.26
  -3  -4  -2 1968.49  101.57
  -3  -4  -2 1734.27   79.98
  -3   4  -2 1676.72   89.18
   3  -4   2 1792.43  135.45
  -5   0   1  406.41   28.68
  -5   0   1  281.89   73.05
  -3   1  -7   10.27   21.18
  -3  -1  -7   19.84   10.78
  -3   1  -7   11.14   15.76
  -5   0   0   98.78   14.24
   0  -5   3    0.49   31.25
   0  -5  -3   12.45   20.12
   0  -5  -3    3.72   13.60
   0   5  -3    4.82   16.26
  -3   3  -5  846.69   96.29
  -3  -3  -5  909.75   60.27
  -3  -3  -5 1047.82   50.76
  -3   3  -5 1018.02   92.19
  -3  -3  -5  931.90   57.99
  -1  -4   6    4.77   19.94
  -1  -4   6   -1.41   31.93
   1  -1   9 1440.22  109.78
  -1   1  -9 1501.30   99.75
  -1  -1  -9 1747.75   84.52
  -1   1  -9 1664.76   99.17
   1   1   9 1416.30  115.39
  -4   2  -4 1425.47   74.54
  -4  -2  -4 1423.82   66.47
  -4  -2  -4 1366.39   75.71
  -4   2  -4 1519.62   94.93
  -4  -2  -4 1207.00   78.31
  -4   2  -4  905.89  216.28
  -4  -1  -5 1231.63   79.33
  -4  -1  -5 1154.63   61.37
  -4   1  -5 1195.94   64.45
  -4   1  -5 1033.34  104.33
  -4  -1  -5 1155.67   80.97
  -4  -2   5  113.88   36.79
  -4   2   5  133.42   26.30
  -4  -2   5   91.59   37.48
  -4   2   5  127.49   45.83
  -3   0   8 2281.61  143.74
  -3   0   8 2313.14  113.92
  -3   0   8 2159.66  160.26
  -3   4   3  497.59   53.61
  -3  -4   3  359.23   50.98
  -3  -4   3  272.63   48.19
  -4   1   6   76.10   43.14
  -4  -1   6   71.04   41.42
  -4  -1   6   59.29   33.52
  -4   1   6   74.43   24.29
  -2   0   9  286.40   55.55
  -2   0   9  363.23   42.88
  -5   0   2   -1.28   39.72
  -5   0   2    1.62    8.51
  -5   0  -1  504.45   64.76
  -5   0  -1  706.40   41.48
  -4   3  -2  699.69   62.08
  -4   3  -2  586.81   96.98
  -4  -3  -2  697.73   37.31
  -4  -3  -2  695.13   44.79
  -4  -3   3 1516.40   75.89
  -4   3   3 1675.92  110.05
  -4  -3   3 1287.22  104.32
  -4   3   3 1334.64   70.01
  -1  -5   3  527.85   58.72
  -5   1   1  312.25   56.05
  -5   1   1  330.93   62.88
  -5  -1   1  380.37   40.84
  -5   1   1  348.73   29.36
  -1  -4  -6  164.63   20.37
   1  -4   6  154.19   46.19
  -1  -4  -6  173.57   22.23
  -5   1   0 1408.70   55.87
  -5  -1   0 1515.88   56.11
  -5   1   0 1225.46  169.24
  -5   1   0 1148.19   92.69
   0  -3  -8  237.75   23.17
  -3  -3   6   18.03   36.34
  -3   3   6    9.22   33.09
   2   4   5   85.38   14.80
  -2  -4  -5   88.94   18.32
  -2  -4  -5   78.30   16.05
  -3  -1   8   54.15   37.91
  -3   1   8   46.05   31.90
  -3   1   8   49.02   40.97
  -3  -1   8   48.54   30.39
  -3  -1   8   49.72   33.11
   0  -2   9 1449.25  103.49
   0   2   9 1413.03   63.57
   0   2   9 1231.78   77.11
   0   2  -9 1614.70  105.96
   0  -2   9 1346.59  110.20
   0  -2  -9 1524.92   69.51
  -1  -5  -3 2159.64   92.29
  -1   5  -3 2352.95  104.18
   1  -5   3 2019.57  120.48
  -2  -1   9 2356.98  110.16
  -2   1   9 2226.62  148.63
  -2  -1   9 2388.47  147.81
  -2   1   9 2045.00  148.91
  -2  -1   9 2586.56  144.91
  -5   1   2  296.53   39.47
  -5  -1   2  299.61   27.92
  -5   1   2  260.67   64.18
  -5   1   2  257.54   29.30
   1  -3  -8 1509.85   63.39
  -1  -3   8 1368.41   99.23
  -1  -3   8 1766.34  137.76
  -1   3   8 1557.51   59.68
  -5   1  -1 1158.81   47.89
  -5  -1  -1 1159.30   71.32
  -5   1  -1  808.64   73.72
  -3  -4  -3   15.98   15.34
  -3   4  -3   12.00   24.25
  -3  -4  -3   13.13   16.20
   3  -4   3   17.49   46.34
  -2  -5   0 1099.70   92.00
   2  -5   0  884.33   82.40
  -2   5   0  934.68   69.65
  -2  -5   0  852.29   60.58
  -2   2  -8  181.64   58.30
   2  -2   8  198.88   52.73
  -2   2  -8  269.74   40.22
  -2  -2  -8  250.48   25.53
  -2   2  -8  246.96   38.15
  -5   0   3   46.41   36.43
  -5   0   3   68.61   24.86
   1  -2  -9   56.17   15.98
  -1  -2   9   64.87   34.42
  -1   2   9   51.12   14.54
  -1  -2   9   53.37   33.43
  -2  -5   1 2735.65  147.83
  -2  -5   1 2299.99  125.13
  -2   5   1 2559.38  123.84
   2  -3   7 4441.29  238.62
   2   3   7 4539.31  129.99
  -2   3  -7 4222.63  204.87
  -2  -3  -7 4824.49  107.52
  -2  -3  -7 4938.83   92.16
  -2   3  -7 5247.10  215.23
  -5   0  -2   75.99   33.23
  -2  -5  -1  485.96   55.06
  -2   5  -1  528.15   45.66
   2  -5   1  371.05   60.89
  -2  -5  -1  433.80   44.50
   0   5  -4   39.92   17.07
   0  -5  -4   40.21   17.10
   0  -5  -4   35.56   15.96
  -3  -4   4  945.64   82.97
  -3   4   4  961.15   80.84
  -3  -4   4  913.37   83.38
  -2  -5   2 1796.20  109.19
  -2  -5   2 1450.16   96.62
  -2  -5   2 1512.30  100.48
  -2   5   2 1590.88  103.57
  -4   3  -3  157.14   42.65
  -4  -3  -3  169.15   19.24
  -4  -3  -3  175.60   20.84
  -4   3  -3  160.79   34.66
  -5   1   3  599.93   86.15
  -5  -1   3  624.69   41.10
  -5  -1   3  426.38   95.83
  -5  -1   3  729.63   61.90
   1   3   8  187.34   22.21
   1  -3   8  135.75   47.28
  -1  -3  -8  189.47   20.26
  -1   3  -8  218.80   52.48
  -4  -3   4 1281.34  118.50
  -4   3   4 1416.37  118.04
  -4  -3   4 1227.51   63.80
  -4   3   4 1127.69   60.81
  -4   0  -6  274.56   31.01
  -4   0  -6  291.61   37.33
  -4   0  -6  202.35   43.86
  -3  -2  -7  611.34   42.26
  -3   2  -7  601.55   68.51
  -3  -2  -7  691.19   44.50
  -3   2  -7  642.16   59.67
  -5   1  -2  505.25   32.26
  -5   1  -2  418.26   50.39
  -5  -1  -2  461.81   37.44
  -5  -1  -2  343.48   46.96
  -2  -4   6 1404.27  100.25
  -2  -4   6 1045.02  106.03
  -1  -5   4  354.80   59.23
  -1  -5   4  253.27   49.33
   1  -5  -4  324.26   39.15
  -2   0  -9   65.03   18.16
  -1   2  -9   79.77   28.48
   1  -2   9   78.07   37.66
  -1  -2  -9   74.76   16.83
  -4   0   7   11.37   27.21
  -4   0   7    8.95   37.74
  -4  -2  -5  531.63   48.23
  -4   2  -5  596.66   59.51
  -4  -2  -5  554.42   34.49
  -4  -2  -5  515.13   58.32
  -2  -5  -2  119.92   30.33
   2  -5   2   94.03   44.74
  -2   5  -2  127.05   22.87
   0   0  10  368.69   61.89
   0   0  10  363.36   72.74
  -4  -2   6  152.34   53.21
  -4   2   6  190.83   50.49
  -4  -2   6  171.56   55.37
   0  -4  -7 1339.33   59.40
   0  -4   7  915.31  122.68
  -5   0   4    5.09   19.00
  -5   0   4    4.54   47.72
  -1  -5  -4  427.47   35.78
  -1  -5  -4  546.76   40.93
  -1   5  -4  587.60   49.32
   1  -5   4  566.97   74.61
  -1   0  10  612.92   77.81
  -1   0  10  745.57   60.75
  -3  -3  -6 1711.40   59.28
   3  -3   6 1637.22  117.91
  -3   3  -6 1321.94  169.87
  -3  -3  -6 1606.33   77.32
  -3   3  -6 1640.80  122.19
  -3   0  -8   65.28   19.49
  -3   0  -8   50.36   20.32
  -5   0  -3  354.21   47.25
  -5   0  -3  373.28   26.18
  -4   1  -6  247.33   45.21
  -4  -1  -6  269.16   38.36
  -4   1  -6  319.32   38.69
  -4  -1  -6  313.61   37.12
  -4   1  -6  278.00   29.13
  -5   2   1  957.32  123.61
  -5   2   1  941.07   91.90
  -5   2   1 1105.00   84.87
  -5  -2   1 1131.96   50.34
  -5  -2   0  802.07   39.88
  -5   2   0  742.74   51.13
  -5   2   0  664.99  115.07
  -5   2   0  825.83   70.70
  -5   2   0  666.22   64.98
  -2  -5   3  396.68   54.35
  -2  -5   3  368.26   49.80
   1  -4  -7 1483.48   64.25
  -1  -4   7 1126.36  104.34
  -1  -4   7 1027.79  120.57
   3  -4   4  527.64   79.15
  -3   4  -4  503.92   64.03
  -3  -4  -4  551.85   39.11
  -3   4  -4  613.78   66.48
   2  -1   9 1107.52  140.60
  -2   1  -9 1275.27   96.10
  -2   1  -9 1277.58   82.49
  -2  -1  -9 1390.43   74.91
  -2  -1  -9 1106.21   78.68
  -4   1   7  684.36   93.20
  -4  -1   7  587.24   74.53
   0  -1  10  116.77   45.28
   0  -1 -10  130.58   20.09
   0   1  10  123.86   31.64
   0  -1  10  123.34   37.42
   0   1 -10  144.57   28.06
   0   1  10  117.86   43.15
  -3  -2   8  101.78   44.96
  -3   2   8   96.89   36.74
  -3   2   8  124.87   50.93
   3  -2  -8   95.49   24.55
  -2   3   8   53.64   28.71
  -2   3   8   57.58   13.20
   2  -3  -8   65.11   17.97
  -2  -3   8   75.94   37.97
  -2  -3   8   81.49   41.74
  -2  -2   9  212.32   38.96
  -2  -2   9  220.38   41.54
  -2   2   9  162.55   32.08
  -2   2   9  214.97   48.56
   2  -2  -9  199.16   40.19
  -5   1   4  213.86   30.94
  -5  -1   4  143.10   55.80
  -5   1   4  170.58   50.29
  -5  -1   4  199.49   34.34
  -5   2   2   48.11   22.30
  -5   2   2   47.02   40.36
  -5  -2   2   48.81   14.06
   1  -1 -10  576.58   65.79
  -1   1  10  586.62   66.76
  -1   1  10  569.34   80.04
  -1  -1  10  654.75   84.34
  -5   2  -1  470.92   43.58
  -5   2  -1  426.87   57.16
  -5   2  -1  359.97  106.03
  -2   4  -6 1556.02  105.32
   2   4   6 1594.82   63.27
  -2  -4  -6 1613.27   62.05
  -2  -4  -6 1582.71   64.85
   2  -4   6 1317.78  118.15
  -3   1  -8  725.75   63.20
  -3  -1  -8  912.87   51.84
  -3   1  -8  867.16   62.19
  -5  -1  -3  573.45   68.43
  -5  -1  -3  649.00   63.18
  -5  -1  -3  781.02   56.04
  -5   1  -3  680.78   68.51
  -3   4   5  191.53   55.29
  -3  -4   5  158.02   33.08
  -3  -4   5  156.84   42.15
  -3   3   7   70.57   37.54
  -3  -3   7  104.90   39.88
  -2  -5  -3  276.89   37.36
  -2   5  -3  319.89   34.89
   2  -5   3  247.79   55.03
   0  -5   5  197.73   41.90
   0  -5  -5  202.55   26.19
   0  -5  -5  202.50   25.29
   1  -4   7   31.68   33.38
   1   4   7   60.68   13.57
  -1  -4  -7   62.96   15.62
  -1  -4  -7   52.83   15.80
   1   0  10   26.82   28.69
   1   0  10   22.30   37.81
  -1   0 -10   52.54   18.96
  -4  -3  -4   24.54   10.98
  -4   3  -4   15.00   24.13
  -4   3  -4   11.34   21.95
  -4  -3  -4   19.54   11.06
  -4  -3   5  114.79   38.89
  -4   3   5  103.48   43.42
  -3   0   9  119.34   44.37
  -3   0   9  108.02   33.63
  -3   0   9  117.43   32.12
  -5   2   3   64.35   46.75
  -5  -2   3   40.36   29.15
  -5   2   3   66.37   24.77
  -5  -2   3   58.55   12.41
   1  -5  -5  116.11   22.88
  -1  -5   5  127.47   37.61
  -5   0   5  763.23   64.82
  -5   0   5  714.07  119.12
  -5   2  -2  361.18   35.46
  -5  -2  -2  385.27   28.30
  -5   2  -2  229.58  106.09
  -5   2  -2  284.83   38.89
  -5  -2  -2  290.71   46.90
   4  -4   0  167.32   51.63
  -4   4   0  270.69   38.64
  -4  -4   0  297.65   31.05
  -4   4   1  144.36   33.27
  -2  -5   4  249.84   46.92
  -2  -5   4  194.56   40.89
   1   1  10   77.33   52.39
   1  -1  10   74.00   33.06
  -1   1 -10  110.11   30.57
  -1  -1 -10  137.14   21.42
   1   1  10   87.73   38.89
  -2   0  10 1401.87  117.78
  -2   0  10 1390.29  102.47
   0  -3  -9  258.58   24.86
   0   3   9  201.96   33.69
  -3   1   9  461.10   71.96
  -3   1   9  522.20   79.50
  -3  -1   9  451.28   56.90
  -3  -1   9  483.30   75.01
  -3  -1   9  535.83   69.90
  -5   0  -4  136.85   32.59
  -5   0  -4  139.95   19.03
  -1  -5  -5   55.21   16.15
  -1   5  -5   49.49   18.90
  -1  -5  -5   52.10   15.58
  -4  -4  -1  127.04   29.83
  -4  -4  -1  115.25   16.76
  -4   4  -1   99.04   36.79
   4  -4   1   72.87   41.86
  -4   4   2  412.43   55.00
  -4  -4   2  429.93   39.65
  -4  -4   2  340.22   48.65
   2  -3   8   69.05   34.88
  -2   3  -8   75.90   31.27
  -2  -3  -8   96.49   18.04
  -2  -3  -8   99.16   15.29
  -1  -3   9   59.62   36.29
   1  -3  -9   72.43   17.37
  -1   3   9   68.12   16.18
  -1  -3   9   76.24   38.01
   2  -4  -7  631.71   45.85
  -2  -4   7  656.06   80.69
  -4  -2  -6  223.20   30.52
  -4  -2  -6  191.69   40.46
  -4   2  -6  236.51   34.69
  -5  -1   5  394.12   75.21
  -5   1   5  645.98  111.28
  -5   1   5  581.22   46.41
  -5  -1   5  527.97   50.57
  -3   4  -5   12.08   17.97
  -3   4  -5   17.97   26.58
  -3  -4  -5   11.08   12.79
  -2   2  -9   64.57   32.43
  -2  -2  -9   37.88   14.80
  -2  -2  -9   40.69   12.18
  -2   2  -9   37.89   21.23
  -4  -2   7   20.33   39.33
  -4   2   7   38.69   45.47
  -4  -2   7   29.71   35.11
  -4   0  -7  311.47   32.52
  -2   5  -4  810.56   54.02
   2  -5   4  601.20   72.58
  -2  -5  -4  688.82   43.92
  -3  -5   0  188.14   25.81
   3  -5   0  149.76   44.18
  -3  -5   0  230.08   38.82
  -3   5   0  213.72   33.32
  -2   1  10  112.51   42.84
  -2  -1  10  126.61   36.73
  -2  -1  10  158.35   39.01
  -2   1  10  117.96   40.46
   0  -2  10  119.18   40.04
   0   2 -10  142.15   33.72
   0   2  10  103.42   26.90
   0  -2 -10  148.13   23.10
   0  -2  10   87.01   35.13
  -3  -5   1  139.94   34.32
  -3   5   1  108.48   27.69
  -3  -5   1   96.76   18.22
  -5  -1  -4  165.75   23.23
  -5   1  -4  209.67   41.10
  -5  -1  -4  191.59   30.31
  -5   1  -4  202.29   25.59
  -5   2   4   83.48   22.90
  -4   0   8   10.57   27.19
  -4   0   8    9.85   25.27
  -4   0   8    8.77   36.90
  -1   2  10   53.69   38.20
  -1  -2  10   54.38   32.06
  -1   2  10   50.04   24.95
   1  -2 -10   54.59   19.22
  -1  -2  10   66.62   33.57
  -3   5  -1   34.86   20.37
  -3  -5  -1   30.87   13.96
  -3  -5  -1   34.35   21.81
   3  -5   1   18.39   36.60
   3  -2   8  204.21   55.71
  -3  -2  -8  232.82   27.91
  -3   2  -8  278.70   49.59
  -3  -2  -8  268.32   38.76
  -3   2  -8  261.73   39.44
  -4  -4  -2   54.15   41.81
  -4  -4  -2   60.67   16.58
  -4   4  -2   57.18   27.98
  -4   4  -2   61.98   35.60
   4  -4   2   51.25   44.10
  -5   2  -3  197.13   35.90
  -5  -2  -3  216.10   26.23
  -5  -2  -3  178.44   38.05
  -4  -4   3  900.19   79.12
  -4   4   3  867.83   83.37
  -4  -4   3  882.87   52.75
  -3  -3  -7  191.14   26.49
  -3  -3  -7  176.03   24.29
   3  -3   7  142.97   51.81
  -3   3  -7  151.12   32.07
  -3   3  -7  103.07   61.65
  -3   5   2  117.46   29.52
   0  -4   8  187.11   63.46
   0   4   8  353.72   28.66
  -3   4   6  139.03   48.83
  -3  -4   6  148.25   34.05
  -3  -4   6  176.01   44.61
   1   3   9  408.28   41.21
  -1  -3  -9  517.80   32.71
  -4  -3  -5  140.79   30.07
  -4  -3  -5  165.13   24.11
  -4   3  -5  156.35   33.08
  -4   3  -5   89.24   64.30
  -4   1  -7  585.93   50.94
  -4  -1  -7  573.97   60.87
  -4  -1  -7  563.20   48.53
  -4   1  -7  454.41   63.92
   0  -6   0 1900.40  132.97
   0  -5  -6   79.89   16.15
   0  -5   6   52.84   28.78
   0  -5  -6   84.69   17.86
  -4  -3   6  175.53   46.52
  -4   3   6  146.95   47.83
  -4   1   8   14.71   37.92
  -4  -1   8   15.99   29.87
   0  -6  -1  148.68   37.50
   0  -6   1  167.78   36.05
   0  -6  -1  135.06   28.86
  -1   4   8  101.94   16.79
   1  -4  -8   94.44   19.07
  -1  -4   8   60.15   33.76
  -2  -5   5   32.42   32.79
  -2  -5   5   39.76   25.92
   2  -4   7   41.38   37.48
  -2  -4  -7   57.35   15.56
   2   4   7   50.20   14.83
  -2   4  -7   41.72   17.45
  -2  -4  -7   52.85   12.93
  -3   5  -2  172.90   29.89
  -3  -5  -2  163.73   22.19
   3  -5   2  102.69   43.23
  -3  -5  -2  155.66   25.04
  -5   3   1   28.55   19.88
  -5  -3   1   48.54   14.18
  -5   3   1   40.79   35.01
  -5   0   6  105.37   48.75
  -5   0   6  109.30   24.42
  -5   3   0    5.01   18.53
  -5   3   0    7.74   27.35
   1  -5  -6   81.64   19.10
  -1  -5   6   54.72   28.20
   1  -2  10   55.14   41.92
  -1   2 -10   61.48   29.13
  -1  -2 -10   78.42   17.19
  -2   0 -10  870.19   61.95
  -2   0 -10  768.36   77.52
  -3   0  -9  643.69   67.15
  -3   0  -9  682.73   52.06
  -3  -3   8   41.33   32.75
   3  -3  -8   31.12   23.74
   1  -6   0  248.05   51.22
  -1  -6   0  301.60   51.61
  -3   5   3   31.06   28.22
  -3  -5   3   32.30   25.27
  -3  -5   3   21.56   31.36
  -3   2   9  739.89   97.87
  -3  -2   9  700.86  105.49
  -3   2   9  649.28   76.62
   0  -6  -2    7.34   19.14
   0  -6   2    6.95   28.04
  -2  -3   9  106.05   44.60
  -2   3   9  117.81   21.38
  -2   3   9   91.42   36.51
  -2  -3   9   90.09   34.23
   2  -3  -9  122.06   26.15
  -5  -3   2  156.48   19.81
  -5   3   2  118.70   24.77
  -5   0  -5   75.88   17.00
  -5   0  -5   73.91   23.77
  -1  -6   1  272.25   46.73
  -1  -6   1  204.49   32.89
  -4   4  -3   47.00   31.57
   4  -4   3   41.79   44.15
  -4  -4  -3   54.63   14.18
  -4  -4  -3   58.48   27.48
  -4   4  -3   52.19   25.10
  -5   3  -1  248.81   33.15
  -5   3  -1  251.18   70.72
  -5  -3  -1  309.83   28.81
  -1  -6  -1  268.40   44.12
  -1   6  -1  254.79   42.01
   1  -6   1  237.80   47.99
   0   0  11   78.59   33.73
   0   0 -11   82.82   25.92
   0   0  11   68.19   32.95
  -1   4  -8  204.73   37.20
   1   4   8  213.83   22.12
   1  -4   8  151.57   52.81
  -1  -4  -8  221.78   22.51
  -1  -4  -8  209.85   22.56
  -4  -4   4  186.79   27.34
  -4   4   4  171.84   46.01
  -5  -2   5   66.07   39.69
  -5   2   5  102.44   25.41
  -5   2   5   89.18   47.58
  -5  -2   5   74.73   42.37
   1  -5   6   30.47   34.42
  -1  -5  -6   39.99   19.14
  -1  -5  -6   42.54   14.76
   1   5   6   47.26   12.27
  -1   5  -6   46.24   20.19
  -5   1   6  664.59   54.10
  -5  -1   6  485.13   82.14
  -1   0  11   -2.59   28.50
  -1   0  11    4.16   25.61
  -2   1 -10  295.62   42.02
  -2  -1 -10  325.62   31.18
  -2   1 -10  299.79   40.03
   2   1  10  215.43   65.84
  -2   5  -5  194.43   28.01
  -2  -5  -5  172.83   21.34
   2  -2 -10   16.05   11.66
  -2   2  10   21.29   28.91
  -2  -2  10   30.95   31.90
  -2  -2  10   21.93   29.76
  -3   1  -9  581.62   53.39
  -3  -1  -9  528.48   40.00
  -3  -1  -9  477.07   59.16
  -3   1  -9  500.13   56.66
  -3  -1  -9  441.82   73.30
  -5  -2  -4  204.86   33.65
  -5  -2  -4  172.24   33.59
  -1  -6   2   42.64   27.44
   1  -6  -2   32.52   19.60
  -1  -6   2   34.51   21.18
  -5   1  -5   17.49   18.46
  -5  -1  -5   18.22   11.97
  -5   1  -5   17.09   23.49
  -5  -1  -5   14.79   17.29
  -3  -5  -3  135.09   20.72
  -3   5  -3  167.53   29.20
   3  -5   3   96.46   46.42
  -3  -5  -3  149.66   20.94
  -5  -3   3    3.34   24.23
  -5   3   3    4.34   19.49
  -5  -3   3    7.13    8.98
  -3  -4  -6  134.21   15.83
   3  -4   6  104.21   48.43
  -3   4  -6  107.13   51.06
  -3   4  -6   88.23   31.00
  -1  -6  -2   65.43   26.90
   1  -6   2   53.50   30.78
  -1   6  -2   69.70   19.58
  -1  -6  -2   66.08   21.70
   0  -1 -11  373.47   59.09
   0   1  11  317.72   58.88
   0  -1  11  308.66   73.53
   0   1 -11  412.44   54.19
   0   1  11  348.51   84.67
   0  -1  11  345.64   62.55
  -5   3  -2   86.94   56.84
  -5  -3  -2  161.90   17.79
   0  -6  -3   62.66   19.80
   0  -6   3   50.07   29.02
   0   6  -3   60.56   22.88
  -3   0  10   10.88   34.51
  -3   0  10   10.93   28.43
  -3   0  10    9.26   24.52
  -1  -1  11   14.01   31.84
  -1   1  11   13.79   31.41
  -1   1  11   13.60   34.24
  -1  -1  11   20.64   29.16
  -4  -2  -7   79.25   21.03
  -4   2  -7   80.45   25.54
  -4  -2  -7   83.11   19.19
  -3   5   4  274.53   51.27
  -3  -5   4  321.99   44.39
  -3  -5   4  257.15   48.01
  -2   4   8  147.92   20.63
   2  -4  -8  151.89   22.53
  -2  -4   8  141.63   40.53
  -4   2   8  687.41  109.75
  -4  -2   8  672.49   87.14
   1   0  11  101.42   49.66
  -1   0 -11  141.02   35.20
   1   0  11  100.52   37.46
  -1   0 -11  132.81   34.08
   4  -3   6  182.17   49.71
  -4   3  -6  210.01   35.50
  -3  -4   7  241.24   45.89
   1  -6  -3   10.97   15.43
   1  -6  -3    8.90   16.24
  -1  -6   3    9.91   20.53
  -1  -6   3   10.61   25.35
  -2  -5   6  267.60   61.52
  -2  -5   6  282.76   50.60
  -3   1  10  267.65   51.85
  -3  -1  10  231.57   46.64
  -3   1  10  234.14   47.29
  -3  -1  10  264.71   62.31
  -3   1  10  253.26   55.46
  -6   0   1    0.16   11.60
  -6   0   1   -0.59   20.62
  -2   3  -9  245.25  101.75
  -2  -3  -9  453.06   62.69
  -2  -3  -9  456.43   40.31
  -4  -4  -4   21.08    9.68
  -4   4  -4   14.41   27.85
  -4   4  -4   16.06   22.04
  -4  -4  -4   23.85   11.37
   4  -4   4   11.41   45.75
  -4   0  -8  211.60   43.74
  -4   3   7 1012.40  128.35
  -4  -3   7  801.73   82.66
  -6   0   0  120.94   19.01
   0  -3 -10   87.06   18.12
  -4   4   5   15.81   31.67
  -4  -4   5   15.77   16.04
  -1   6  -3   31.35   17.84
  -1  -6  -3   30.73   17.17
   1  -6   3   20.06   28.97
   0   5  -7  307.95   38.41
   0  -5  -7  262.28   27.74
   0  -5   7  159.10   49.18
   0   5   7  333.29   26.15
  -5   3   4   12.58   36.90
  -5  -3   4   12.74   10.31
  -5   3   4   14.35   20.45
  -5  -3   4    8.97   24.67
  -4   0   9  241.72   51.69
  -4   0   9  272.37   73.74
  -4   0   9  332.92   65.77
  -6   0   2  328.52   38.18
   1  -3 -10   80.01   22.28
  -1   3  10   61.04   34.57
  -1  -3  10   61.78   34.42
  -1   3  10   68.67   26.64
  -5   0   7    3.94   39.55
   1   1  11  122.23   38.60
   1  -1  11  128.68   58.97
  -1  -1 -11  160.02   30.07
  -1   1 -11  160.33   29.83
  -2  -6   0   39.11   17.36
  -2  -6   0   42.39   25.57
  -2   6   0   42.58   22.52
   2  -6   0   31.44   27.90
  -3  -3  -8  104.64   23.15
  -3   3  -8   99.06   30.39
   3  -3   8   77.78   38.21
  -3  -3  -8  103.82   20.15
  -2  -6   1   81.08   30.71
  -2  -6   1   62.80   18.75
  -5   3  -3   14.19   40.45
  -5  -3  -3   32.24   10.60
  -5  -3  -3   27.22   13.08
  -5   3  -3   26.50   28.18
  -6   0  -1   15.10   12.62
  -5  -2   6   85.37   40.29
  -5   2   6  130.37   54.31
  -5  -2   6   73.10   38.28
   1  -5  -7  172.77   22.14
  -1  -5   7  126.02   38.15
   3  -5   4  119.76   46.39
  -6   1   1  190.68   29.23
  -6  -1   1  219.76   34.92
  -6  -1   1  198.84   31.79
  -6   1   1  156.73   26.17
  -2   6  -1   70.97   23.00
   2  -6   1   50.75   29.21
  -2  -6  -1   70.75   18.67
  -2  -6  -1   79.11   28.43
  -2   2 -10  115.82   35.27
  -2  -2 -10   95.83   23.48
  -2  -2 -10  123.74   23.35
  -4  -1  -8  154.60   32.05
  -4   1  -8  107.86   33.32
  -4   1  -8  157.03   28.58
  -6  -1   0   20.75   10.42
  -6   1   0   17.06   14.78
  -6   1   0   20.27   21.96
   0  -6   4  163.84   33.92
   0  -6  -4  177.30   24.01
   0   6  -4  211.41   34.65
  -3  -2  -9   32.28   15.81
  -3  -2  -9   28.87   15.56
  -3   2  -9   28.94   20.92
  -3  -2  -9   24.46   15.77
  -3   2  -9   37.03   29.41
  -5   0  -6   66.69   23.79
  -5   0  -6   71.36   19.21
   0   4   9  679.98   41.82
  -4  -1   9   35.69   32.75
  -4   1   9   43.46   38.51
  -4   1   9   32.51   26.36
  -4  -1   9   49.46   39.09
  -5  -2  -5  186.04   30.23
  -5  -2  -5  166.09   35.30
  -6  -1   2   23.96   12.11
  -6   1   2   25.72   51.95
  -6  -1   2   28.88   23.50
  -2   1  11  111.17   40.00
  -2  -1  11   92.84   34.79
  -2   1  11  112.42   47.45
  -2  -1  11  116.21   35.09
   2  -6  -2   72.41   21.29
  -2  -6   2   91.10   19.85
  -2  -6   2  114.47   32.76
  -5   1   7  134.60   47.73
  -5  -1   7  136.46   43.72
  -6   0   3  102.48   26.54
   2  -4   8   12.83   29.64
  -2   4  -8   28.94   30.29
  -2  -4  -8   44.74   14.18
  -2  -4  -8   44.62   11.84
   2  -5   6   40.71   37.17
   2   5   6   48.17   14.52
  -2  -5  -6   49.49   14.25
   0   2  11  242.28   77.83
   0  -2  11  366.56   74.90
   0   2  11  285.16   65.73
   0   2 -11  380.95   63.39
   0  -2 -11  403.14   52.57
   1  -4  -9  155.99   22.63
  -1   4   9  167.32   26.23
  -1   4   9  128.12   36.86
  -3  -5   5   18.95   22.87
  -3  -5   5   18.30   30.28
  -6  -1  -1    2.68    9.62
  -6   1  -1    0.02   15.93
   1  -6  -4 1089.94  110.10
  -1  -6   4  844.22   95.65
   1  -6  -4 1074.83  104.74
  -1  -5  -7   38.63   13.72
   1   5   7   43.09   13.81
  -1   5  -7   42.10   19.80
   1  -5   7   23.66   27.87
  -1  -5  -7   44.63   13.42
  -1   2  11    9.08   23.65
  -1  -2  11   17.61   29.10
  -1  -2  11   19.28   36.35
   1  -2 -11   18.88   15.45
  -1   3 -10   45.50   31.19
  -1  -3 -10   62.47   15.05
   2  -6   2   21.22   29.82
  -2   6  -2   31.34   19.42
  -2  -6  -2   34.93   28.25
  -6   0  -2    2.39   12.89
  -5   1  -6  112.48   33.49
  -5  -1  -6   96.44   25.96
  -5  -1  -6   96.46   29.05
  -3  -3   9    6.00   34.08
   3  -3  -9    3.34   12.11
   1  -6   4   33.02   29.63
  -1   6  -4   53.88   18.70
  -1  -6  -4   52.67   16.96
  -6  -1   3   62.44   22.86
  -6   1   3   46.31   44.70
  -5  -3   5   21.15   27.68
  -5   3   5   31.82   39.44
  -3  -4  -7  110.39   25.15
  -3   4  -7   75.39   65.61
  -3  -4  -7  124.29   17.98
   3  -4   7   80.41   41.76
  -4   5   0   49.27   31.40
  -4  -5   0   52.20   19.09
  -4   5   1    0.05   28.96
  -2  -6   3   76.44   21.61
  -3  -2  10   43.25   34.73
  -3   2  10   33.08   29.38
  -1  -4  -9    4.77   12.55
  -1   4  -9    3.85   16.70
   1   4   9    5.86   13.00
  -4  -4  -5   15.30   10.26
  -4   4  -5    8.61   27.80
   4  -4   5    9.92   43.94
  -4   4  -5    4.41   29.18
  -2   3  10  512.52   73.48
   2  -3 -10  639.61  102.15
  -2  -3  10  625.65   83.81
  -6   1  -2   42.76   18.07
  -6   1  -2   33.99   27.33
  -5   3  -4   55.43   28.92
  -5  -3  -4   84.02   29.10
  -5  -3  -4   89.21   22.54
  -3   0 -10   20.92   22.32
  -3   0 -10   31.45   18.33
  -6   0   4   89.81   23.92
  -6   0   4   55.35   42.62
  -4   4   6   52.18   38.04
  -4  -5  -1   10.13   10.96
  -4   5  -1   10.92   26.56
   4  -5   1    4.53   33.81
  -4  -5  -1   13.04   14.46
  -4   5   2  200.10   42.20
  -4  -5   2  255.89   35.00
  -1   2 -11   46.77   31.71
  -1  -2 -11   40.09   15.43
   1   2  11   39.19   32.33
  -2   0 -11    5.76   20.31
  -2   0 -11    5.21   16.08
  -2   5   7  136.39   20.32
  -2  -5   7   91.42   39.52
   2  -6   3  205.75   54.01
  -2   6  -3  308.55   42.85
  -5  -4   1   67.90   15.51
  -5   4   0  103.42   63.66
   0  -6   5  254.01   52.86
   0  -6  -5  305.55   37.69
   0   6  -5  353.78   54.52
  -3  -5  -5   25.34   12.23
   3  -5   5   18.06   39.97
  -6  -2   1    9.21    8.91
  -6   2   1   10.66   34.29
  -6   2   1    4.99   19.34
  -6  -2   1    9.13   21.90
  -4  -2  -8  369.87   53.70
  -4   2  -8  390.60   59.51
   4  -2   8  249.21   58.37
  -4  -2  -8  359.31   65.58
  -6   2   0  114.38   27.48
  -6  -2   0  128.55   27.11
  -6   2   0   75.29   49.71
  -4  -3  -7   44.92   15.31
  -4  -3  -7   42.94   19.49
  -4   3  -7   41.51   28.78
   4  -3   7   37.38   43.40
  -3  -4   8  228.05   53.12
   3  -4  -8  194.00   35.58
  -3  -1 -10   76.44   20.45
  -3   1 -10   79.45   26.06
  -3  -1 -10   58.28   24.51
  -6  -1   4   38.28   20.64
  -6   1   4   44.01   19.76
  -6   1   4   38.00   38.42
  -2   4   9   20.57   11.69
  -2  -4   9   10.63   32.13
   2  -4  -9   21.74   15.45
  -5   4   2  156.10   54.63
  -5  -4   2  197.44   28.05
  -4  -2   9  113.03   41.51
  -4   2   9  112.99   41.03
  -4   3   8  264.21   65.48
  -4  -3   8  308.73   57.59
  -6   2   2   15.30   36.85
  -6  -2   2   15.94   10.27
  -6   2   2   12.97   18.80
  -2  -2  11  226.42   59.66
  -2   2  11  203.02   54.34
  -2  -2  11  212.91   53.42
  -2   2  11  211.26   43.98
  -5  -2   7   13.47   29.54
  -5   2   7   16.60   41.38
   5  -4   1   53.63   38.72
  -5  -4  -1  125.51   21.69
  -5   4  -1   71.88   51.40
  -1  -6   5  156.68   41.66
   1  -6  -5  165.02   27.70
  -2   1 -11   66.59   28.47
  -2  -1 -11   75.12   22.80
  -4  -5  -2  116.08   19.58
  -4  -5  -2  116.50   19.17
   4  -5   2   71.33   39.63
   0   0 -12    3.31   18.73
   0   0  12    1.01   31.37
   0   0  12   -2.53   27.05
  -4   5   3   30.59   32.59
  -4  -5   3   38.20   18.65
  -6  -2  -1   20.18    9.98
  -6   2  -1   15.34   20.28
   2  -6  -4   98.12   23.69
  -2  -6   4  122.28   32.39
   0   5  -8   67.08   22.47
   0  -5  -8   66.40   17.87
   0   5   8   67.41   15.98
  -3  -5   6  309.88   44.36
   3  -5  -6  231.73   32.29
  -3  -5   6  230.63   50.79
  -1   0  12  267.26   59.67
  -1   0  12  254.91   54.02
  -6   1  -3   54.52   28.82
  -6  -1  -3   86.58   20.49
  -5   2  -6  194.57   39.29
  -5  -2  -6  187.98   29.72
  -5  -2  -6  182.87   32.81
  -3   0  11  134.32   38.14
  -3   0  11  128.90   41.11
  -1   6  -5   10.59   18.52
  -1  -6  -5    7.94   12.74
   1   6   5    9.17   11.55
  -1   5   8    4.13   11.66
  -6   2   3   18.74   18.39
  -6   2   3   18.71   39.88
  -5  -4   3   96.09   20.43
  -5   4   3   76.52   39.87
  -5   0  -7  944.07  103.13
  -4   0  -9  233.48   43.71
  -4   0  -9  176.07   48.48
  -6   0   5    6.53   35.97
  -6   0   5    4.87   18.28
  -2  -5  -7   38.62   11.86
  -2   5  -7   32.38   24.85
   2  -5   7   25.07   33.22
   0   1  12  299.22   63.10
   0  -1  12  285.94   54.57
   0  -1 -12  366.20   66.75
   0   1  12  274.97   73.24
   0  -1  12  360.37  101.72
   0   1 -12  400.52   62.24
  -5  -1   8   67.84   42.27
  -5   1   8   72.85   42.89
  -5   4  -2   78.95   55.74
   5  -4   2   73.19   38.91
  -5  -4  -2  131.44   20.59
  -5  -3   6   55.11   31.13
  -5   3   6   92.95   50.35
  -4   0  10  109.89   39.81
  -4   0  10   89.95   39.07
  -1  -1  12   16.13   25.94
  -1   1  12   18.62   33.49
  -1   1  12   21.53   30.84
  -1  -1  12   14.57   28.86
  -2  -6  -4  173.94   25.11
  -2   6  -4  152.02   27.44
   2  -6   4  113.89   40.89
  -3   6   0   43.27   29.12
  -3  -6   0   43.45   21.56
  -3  -6   0   39.33   14.62
  -3  -3  -9   24.07   18.72
  -3  -3  -9   30.29   14.38
  -3  -3  -9   31.40   13.63
  -6   2  -2    4.36   20.05
  -3   6   1   63.93   32.28
  -3  -6   1   93.40   28.57
  -3   1  11   79.99   31.62
  -3  -1  11   63.01   34.72
  -3   1  11   55.90   32.24
  -5  -3  -5  176.75   30.74
  -5   3  -5  163.52   37.89
   5  -3   5  142.24   52.67
  -5  -3  -5  176.70   38.97
  -4  -5  -3    2.03    9.56
   4  -5   3    5.96   36.40
  -4  -5  -3    3.01    9.45
  -5  -1  -7  160.96   39.35
  -4   1  -9   31.81   22.11
  -4  -1  -9   27.55   18.11
  -3   6  -1  102.64   29.54
  -3  -6  -1  129.41   25.44
  -3  -6  -1  118.36   20.21
   3  -6   1   67.01   37.51
   0  -3 -11   14.56   13.54
  -6   1   5    0.68   35.03
  -6   1   5    4.96   18.24
  -1  -5  -8   77.29   17.51
   1  -5   8   36.00   29.32
   1   5   8   75.97   21.08
  -4  -5   4   48.59   16.28
  -4   5   4   36.96   31.30
  -1   0 -12  167.67   39.32
   1   0  12  128.13   50.03
  -6   0  -4    6.93   15.77
  -4   4  -6   22.84   29.92
  -4   4  -6   13.54   28.45
  -3  -6   2  171.18   33.39
   1  -3 -11   10.95   15.29
  -1   3  11    6.54   27.58
  -1   3  11    6.38   25.16
  -2  -4  -9   42.23   19.88
  -2  -4  -9   44.51   15.76
  -2   4  -9   27.41   40.20
  -4  -1  10    8.39   28.02
  -4   1  10    4.74   25.49
  -4   1  10    3.32   29.15
   4  -4  -7   43.74   17.53
  -4   4   7   48.91   41.31
   0   4 -10  362.87   70.26
   0  -4 -10  443.08   48.56
   0  -6   6  117.21   38.80
   0   6  -6  192.12   32.75
   0   6   6  197.50   25.59
  -3  -2 -10  214.37   52.60
  -3   2 -10  241.48   44.76
  -6   2   4   20.08   43.51
  -6   2   4   16.86   18.77
  -5   4   4  147.48   45.43
  -2   0  12  284.14   56.87
  -1   4  10    0.19   26.69
   1  -4 -10    4.76   13.40
  -3   5  -6   63.95   36.11
  -3  -5  -6  104.42   17.44
   2  -6  -5  132.27   27.49
  -2  -6   5  157.22   35.72
  -2  -2 -11   36.81   15.70
   2   2  11   18.59   30.42
  -2  -2 -11   26.62   23.93
  -3  -4  -8  151.67   28.80
   3  -4   8   77.91   40.91
   5  -4   3   15.61   36.06
  -5  -4  -3   33.44   11.75
  -5   4  -3   16.04   32.69
  -1  -1 -12  297.21   52.49
  -1  -1 -12  275.59   65.47
  -1   1 -12  268.01   47.60
   1   1  12  202.97   49.70
  -6   1  -4   63.03   29.83
  -6  -1  -4   75.92   19.18
  -3  -6  -2   39.90   14.27
  -3   6  -2   34.17   23.70
  -3  -6  -2   40.45   15.85
  -3  -3  10  101.38   37.69
  -3   3  10   89.12   26.40
   1   6  -6  100.68   30.79
   1  -6  -6  100.87   23.17
  -1  -6   6   92.35   32.74
  -6   2  -3   10.90   28.76
  -6   2  -3    9.73   20.33
  -6  -2  -3   11.39   10.38
  -2   5   8  103.10   19.40
   2  -5  -8   91.64   18.10
  -3  -6   3    7.01   20.85
  -2   1  12   56.24   32.17
  -2  -1  12   57.16   33.22
  -2  -1  12   47.52   32.05
  -2   1  12   53.78   28.44
   1   3  11  641.30  102.90
  -1  -3 -11  824.82   96.63
  -6   0   6   -3.84   33.37
   0  -2 -12   93.79   34.59
   0   2  12   67.12   31.38
   3  -5  -7    4.61   14.07
  -3  -5   7    4.54   26.44
  -5  -2   8   74.95   35.60
  -5   2   8  100.24   44.24
   1   6   6   34.38   14.05
   1  -6   6   24.12   26.55
  -1  -6  -6   32.36   10.92
  -1   6  -6   33.79   19.55
  -6   3   1    2.21   18.36
  -6   3   1    6.00   37.10
  -6  -3   1    6.57    8.10
  -1   4 -10  207.13   78.35
  -1  -4 -10  329.24   41.28
  -4   5  -4  129.05   62.99
   4  -5   4  111.51   45.93
  -4  -5  -4  195.16   27.24
  -1   2  12  117.82   53.39
  -1  -2  12  115.24   37.18
   2  -6   5    1.96   26.05
  -2  -6  -5    2.11   12.48
  -2   6  -5    0.66   17.56
   4  -3   8   57.81   35.20
  -4   3  -8   93.14   31.61
  -4  -3  -8  112.22   33.55
  -6  -3   0   69.31   19.91
  -6   3   0   39.48   20.55
  -6   3   0   38.68   42.16
   0  -7   0    0.40   27.61
   0  -7   0    1.68   17.77
  -3  -2  11  146.53   39.62
   3  -4  -9   17.99   13.30
  -3  -4   9   17.23   31.58
   0  -7  -1   64.61   19.93
   0  -7   1   60.59   32.11
  -6  -3   2    7.35    9.57
  -6   3   2    5.53   32.72
  -2   3  11   36.02   29.98
  -2  -3  11   38.19   32.15
  -2   3  11   41.67   23.36
  -5  -3   7   89.81   40.75
  -5   3   7  126.81   45.94
  -3  -6  -3  134.56   20.43
   3  -6   3   70.61   31.76
  -3   6  -3  120.48   32.07
   5  -2   7   15.82   39.18
  -5   2  -7    8.05   22.76
  -4   2  -9   21.47   22.91
  -4  -2  -9   22.73   17.28
  -6   1   6   17.91   37.75
  -6   2   5   89.52   45.54
  -5   0   9  196.71   51.94
  -5   4   5   27.67   33.36
;
_shelx_hkl_checksum   16579
#==============================================================================
#     End of CIF
#==============================================================================
